# Supplementary material for: Origin of site-selectivity of hydrogen atom transfer in carbohydrate C–H alkylations via photoredox catalysis
Source: Royal Society of Chemistry journal article supplement (doi:10.1039/d4qo00073k), 2024-01-01
Supplement: d4qo00073k1.pdf [file d4qo00073k1.pdf]

## Electronic Supplementary Information

### Origin of site-selectivity of hydrogen atom transfer in carbohydrate C–H alkylations via photoredox catalysis

Yujie Ji,<sup>a</sup> Lingfei Hu,<sup>a</sup> Han Gao,<sup>a</sup> Yan-Bo Wu,<sup>b</sup> Xiangying Lv\*<sup>a</sup> and Gang Lu\*<sup>a</sup>

<sup>a</sup> School of Chemistry and Chemical Engineering, Key Laboratory of Colloid and Interface Chemistry, Ministry of Education, Shandong University, Jinan, Shandong 250100, China

<sup>b</sup> Key Lab for Materials of Energy Conversion and Storage of Shanxi Province and Key Lab of Chemical Biology and Molecular Engineering of Ministry of Education, Institute of Molecular Science, Shanxi University, Taiyuan, Shanxi 030006, China

Corresponding Author: [xiangyinglv@sdu.edu.cn](mailto:xiangyinglv@sdu.edu.cn); [ganglu@sdu.edu.cn](mailto:ganglu@sdu.edu.cn)

#### Table of Contents

|                                                                                                           |     |
|-----------------------------------------------------------------------------------------------------------|-----|
| <b>Thermodynamics of the Generation of Tetracoordinated Diarylborinic Ester</b> .....                     | S2  |
| <b>Conformational Search for the HAT Transition States</b> .....                                          | S2  |
| <b>HAT of Sugar 1 without Ph<sub>2</sub>BOH</b> .....                                                     | S4  |
| <b>Role of Ph<sub>2</sub>BOH in Lactonization Process</b> .....                                           | S6  |
| <b>EDA Results of HAT Transition States</b> .....                                                         | S6  |
| <b>Relationships among HAT Barriers, Charge Transfer and C–H <math>\sigma</math> Orbital Energy</b> ..... | S8  |
| <b>Computed Bond Dissociation Energy and <math>\sigma</math> Orbital Energies of C–H Bonds</b> .....      | S9  |
| <b>Conformational Search for Other Transition States</b> .....                                            | S9  |
| <b>Energy Terms of EDA along IRC</b> .....                                                                | S10 |
| <b>Cartesian Coordinates (Å) and Energies of the Optimized Structures</b> .....                           | S12 |

## Thermodynamics of the Generation of Tetracoordinated Diarylborinic Ester

The complexation of the cis-1,2-diol moieties in sugar **1** with Ph<sub>2</sub>BOH, leading to the tetracoordinated borinic ester (**1**/BPh<sub>2</sub> anion), is thermodynamically favored (Fig. S1). This is consistent with prior experimental observations.

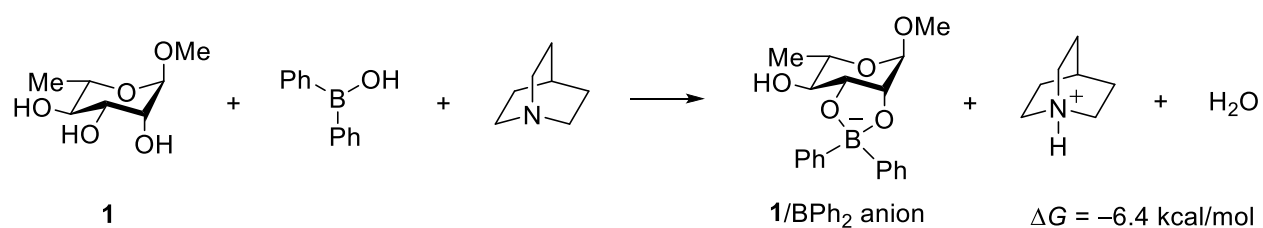

**Fig. S1** Computed energetics for the formation of **1**/BPh<sub>2</sub> anion.

## Conformational Search for the HAT Transition States

The competing HAT transition states are key to the site-selectivity. To obtain the lowest energy structures for these transition states (**TS1**~**TS5**), we carried out conformational search using CREST with the default setting. As shown in Fig. S2, the suggested 51 conformers for **TS1**, 52 conformers for **TS2**, 45 conformers for **TS3**, 51 conformers for **TS4** and 38 conformers for **TS5** were further calculated at the M06-2X/def2-TZVP-SMD(MeCN)//M06-2X/def2-SVP(MeCN) level. The three lowest energy conformers of these transition states are shown in Fig. S2.

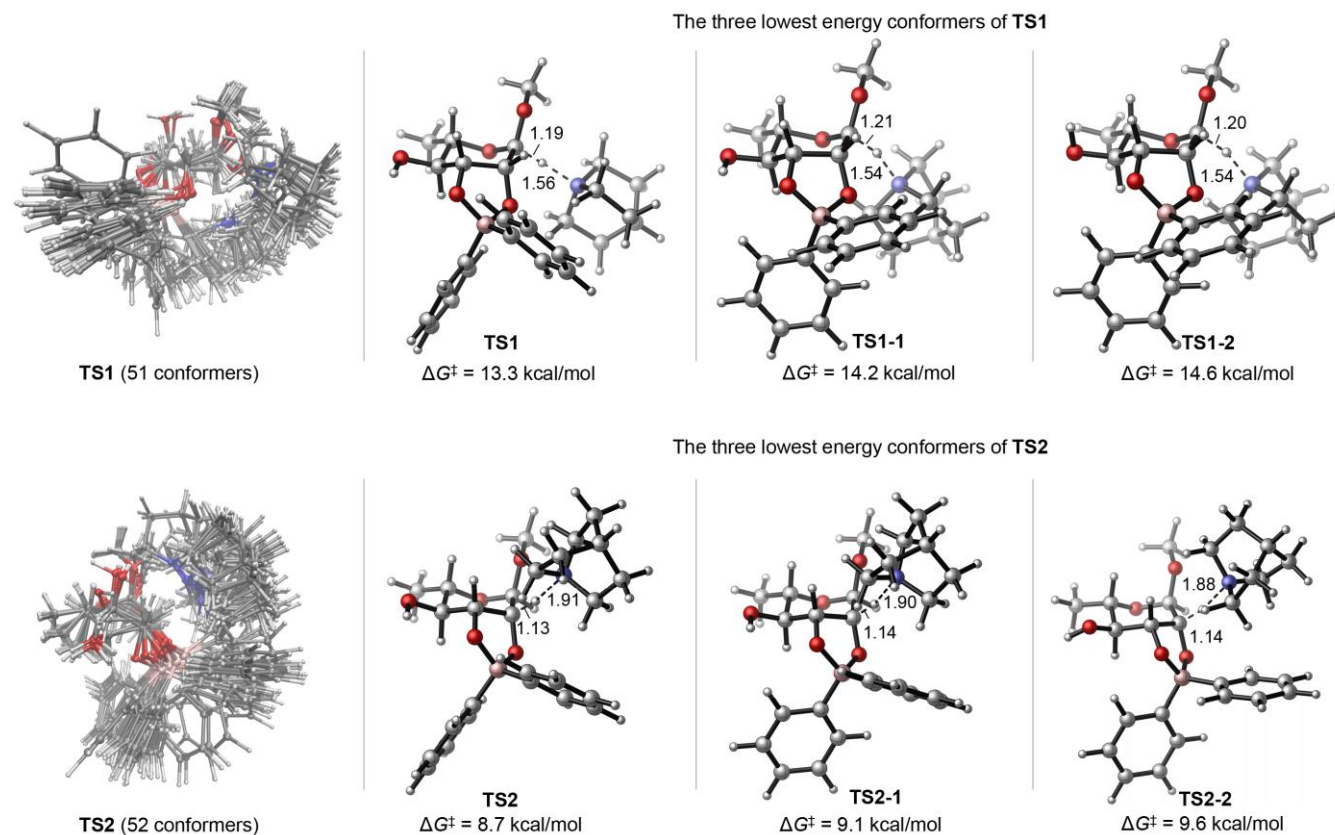

The three lowest energy conformers of **TS3**

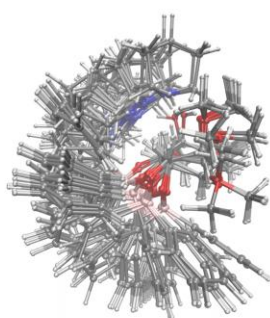

**TS3** (45 conformers)

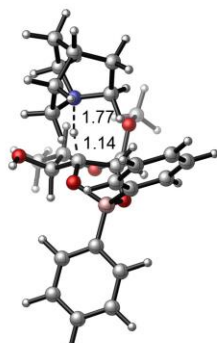

**TS3**

$\Delta G^\ddagger = 10.4$  kcal/mol

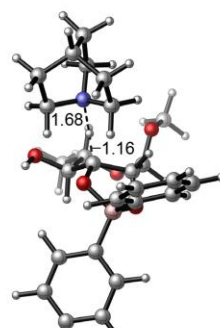

**TS3-1**

$\Delta G^\ddagger = 11.1$  kcal/mol

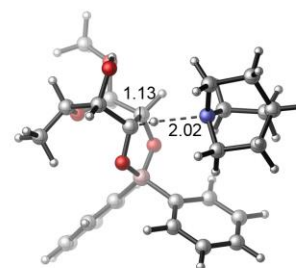

**TS3-2**

$\Delta G^\ddagger = 11.7$  kcal/mol

The three lowest energy conformers of **TS4**

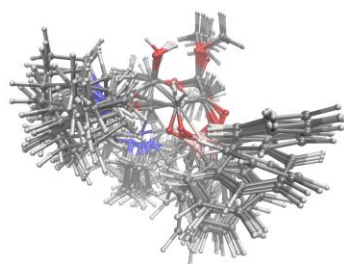

**TS4** (51 conformers)

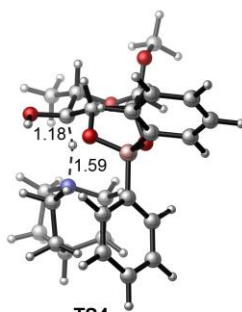

**TS4**

$\Delta G^\ddagger = 13.9$  kcal/mol

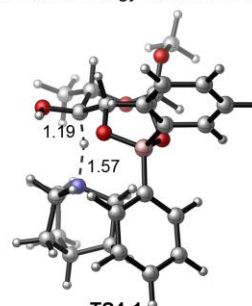

**TS4-1**

$\Delta G^\ddagger = 14.6$  kcal/mol

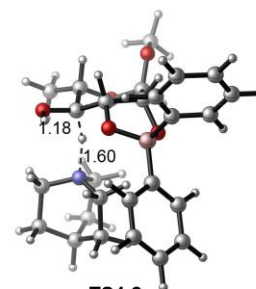

**TS4-2**

$\Delta G^\ddagger = 16.4$  kcal/mol

The three lowest energy conformers of **TS5**

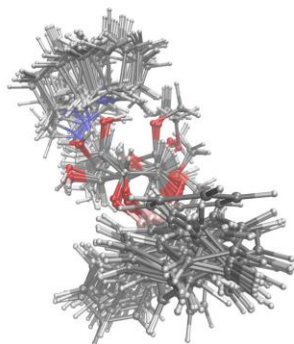

**TS5** (38 conformers)

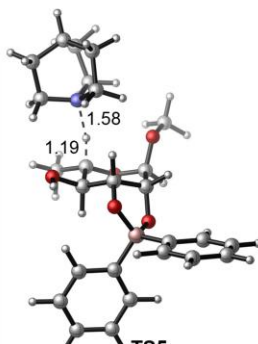

**TS5**

$\Delta G^\ddagger = 14.1$  kcal/mol

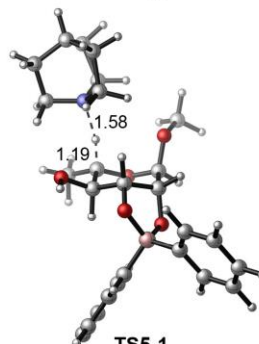

**TS5-1**

$\Delta G^\ddagger = 14.5$  kcal/mol

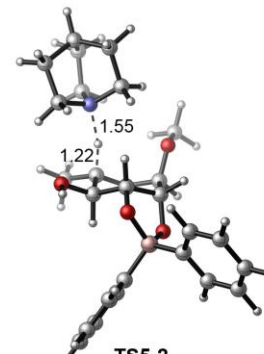

**TS5-2**

$\Delta G^\ddagger = 15.2$  kcal/mol

**Fig. S2** Results of conformational search for **TS1~TS5**.

## HAT of Sugar 1 without Ph<sub>2</sub>BOH

In the absence of Ph<sub>2</sub>BOH, the HAT transition states with sugar **1** have relatively small barrier differences (Fig. S3). Detailed conformational searches were also performed for these five HAT transition states (Fig. S4).

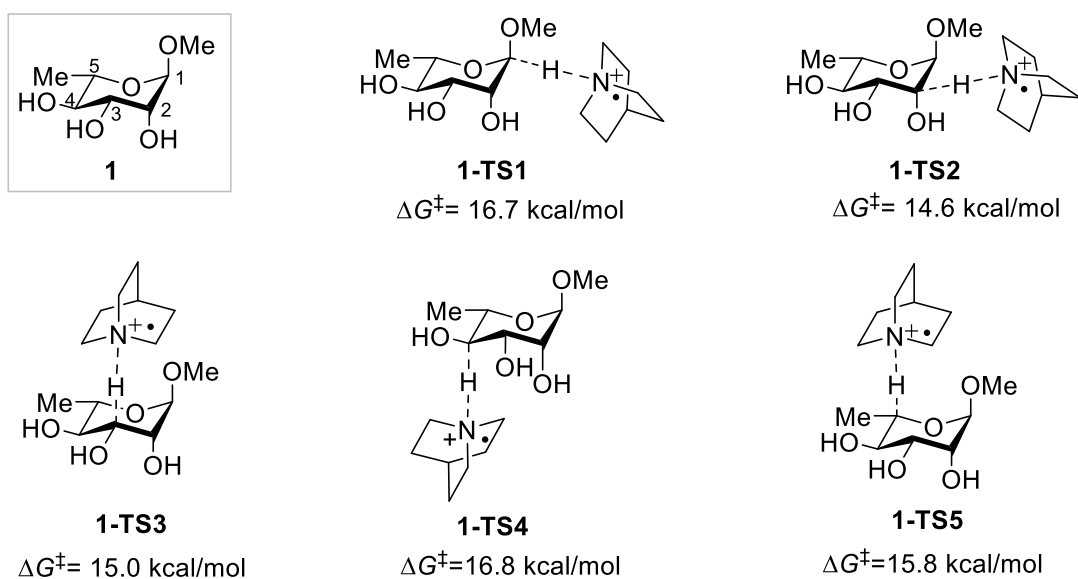

**Fig. S3** Computed HAT barriers with sugar **1**.

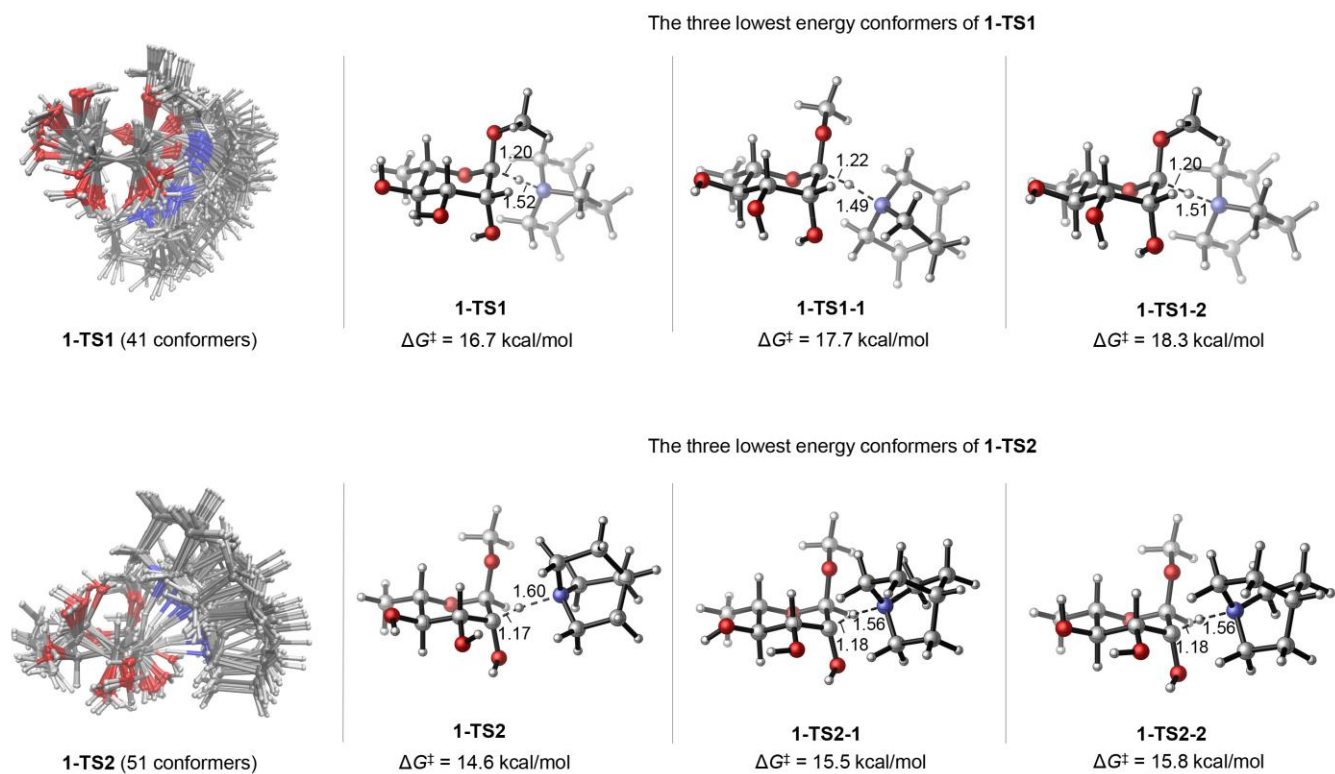

The three lowest energy conformers of **1-TS3**

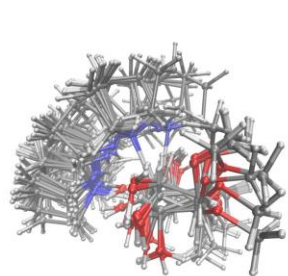

**1-TS3** (53 conformers)

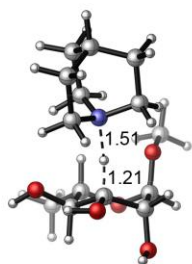

**1-TS3**  
 $\Delta G^\ddagger = 15.0$  kcal/mol

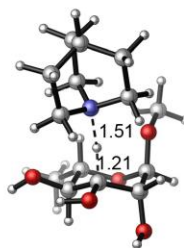

**1-TS3-1**  
 $\Delta G^\ddagger = 15.4$  kcal/mol

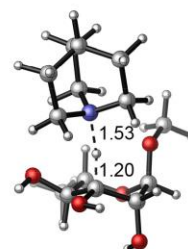

**1-TS3-2**  
 $\Delta G^\ddagger = 16.5$  kcal/mol

The three lowest energy conformers of **1-TS4**

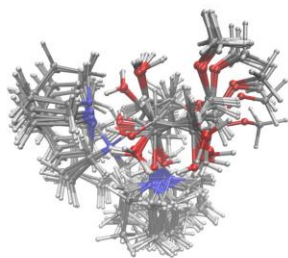

**1-TS4** (42 conformers)

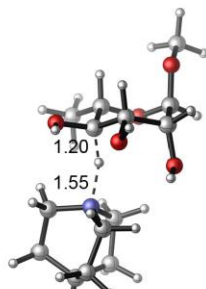

**1-TS4**  
 $\Delta G^\ddagger = 16.8$  kcal/mol

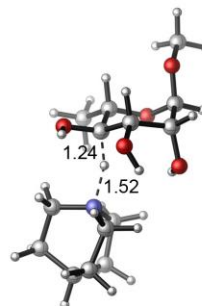

**1-TS4-1**  
 $\Delta G^\ddagger = 18.2$  kcal/mol

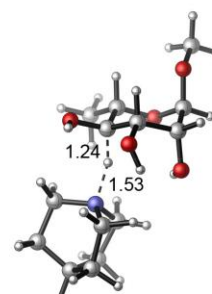

**1-TS4-2**  
 $\Delta G^\ddagger = 18.6$  kcal/mol

The three lowest energy conformers of **1-TS5**

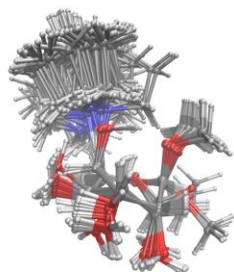

**1-TS5** (44 conformers)

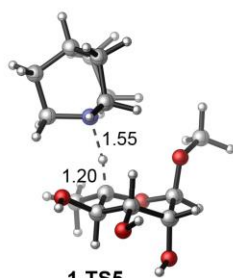

**1-TS5**  
 $\Delta G^\ddagger = 15.8$  kcal/mol

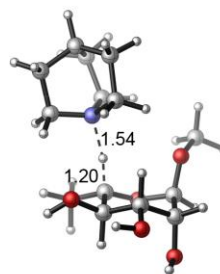

**1-TS5-1**  
 $\Delta G^\ddagger = 16.2$  kcal/mol

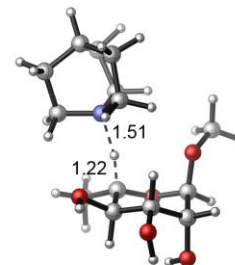

**1-TS5-2**  
 $\Delta G^\ddagger = 16.9$  kcal/mol

**Fig. S4** Results of conformational search for **1-TS1~1-TS5**.



## Role of Ph<sub>2</sub>BOH in Lactonization Process

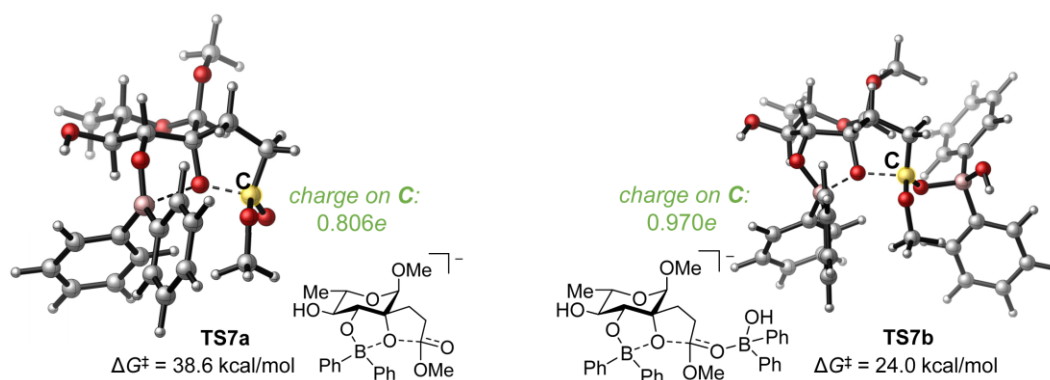

**Fig. S5** NPA charges in **TS7a** and **TS7b**.

## EDA Results of HAT Transition States

The comparisons of EDA results for **TS2** against **TS3~TS5** were given in Fig. S6-S8. The effect of charge transfer is the dominant factor accounting for the lower barrier of **TS2** than **TS3~TS5**. The stronger charge transfer in **TS2** ( $\Delta\Delta E_{ct} = -2.1 \sim -9.4$  kcal/mol) is mostly due to the greater orbital interactions from the C2-H  $\sigma$  orbital to the N SOMO ( $\Delta E_{ct} = -7.0 \sim -17.4$  kcal/mol).

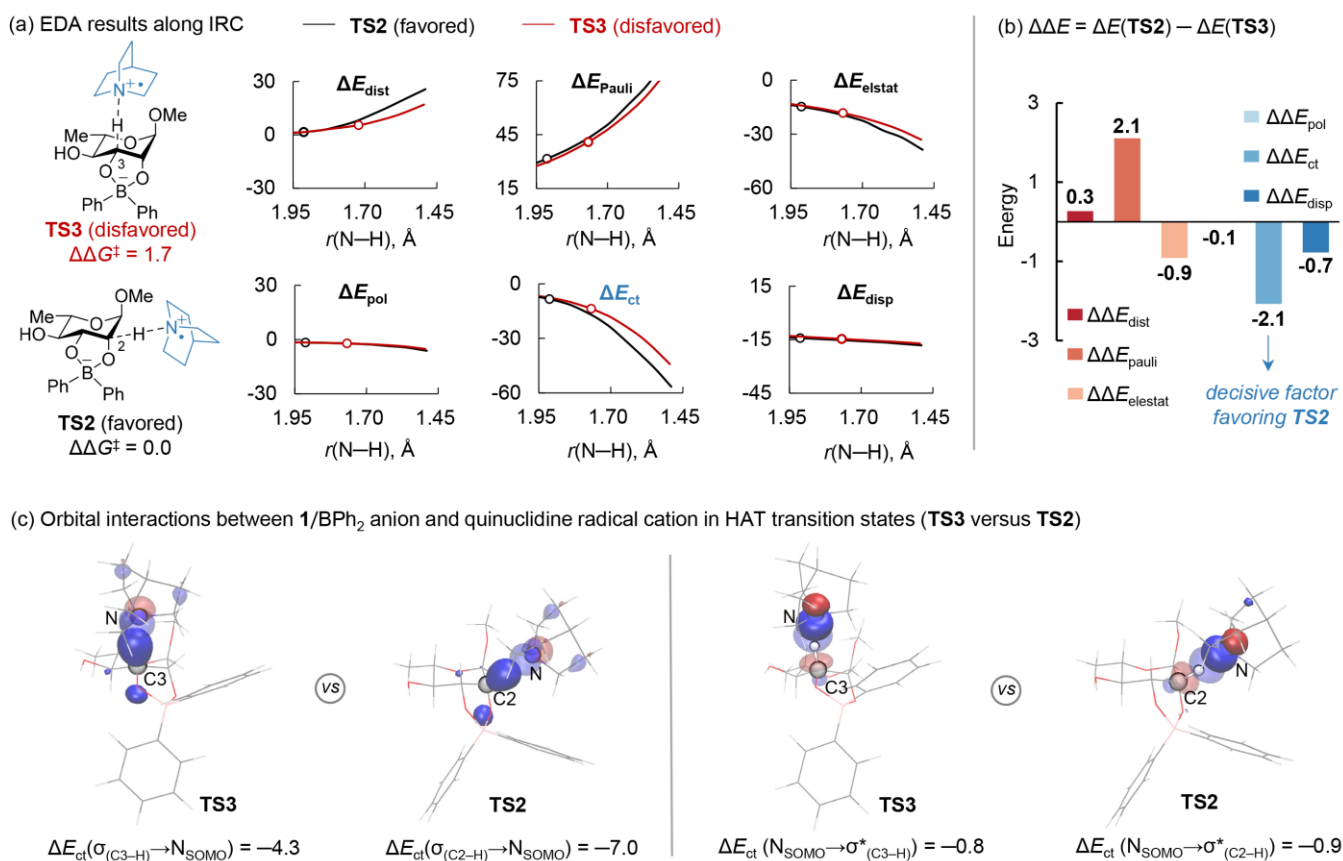

**Fig. S6** EDA results for HAT transition states (**TS3** versus **TS2**). (a) EDA energy terms along IRC. (b) The bar chart of difference in six energy terms. (c) Comparison of orbital interactions. All energies are given in kcal/mol.

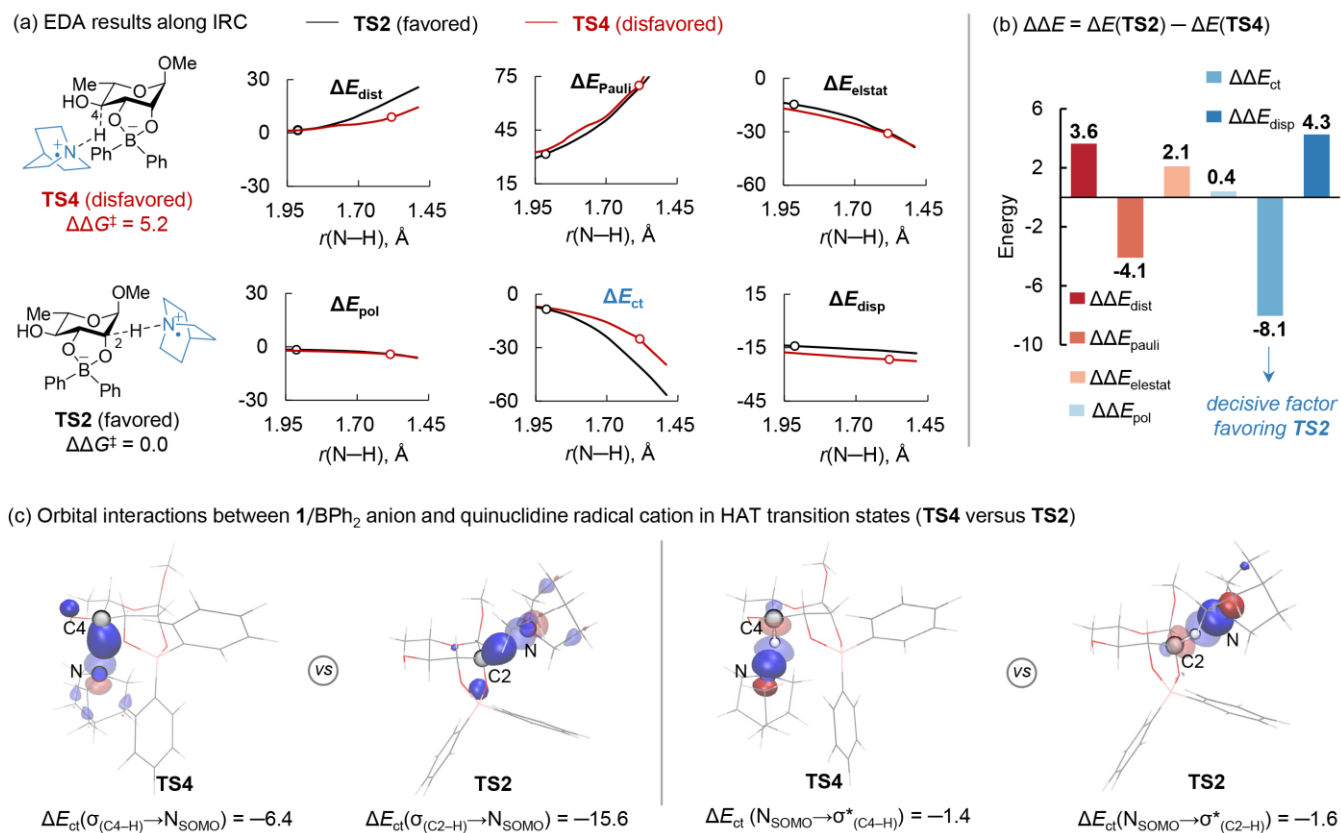

**Fig. S7** EDA results for HAT transition states (**TS4** versus **TS2**). (a) EDA energy terms along IRC. (b) The bar chart of difference in six energy terms. (c) Comparison of orbital interactions. All energies are given in kcal/mol.

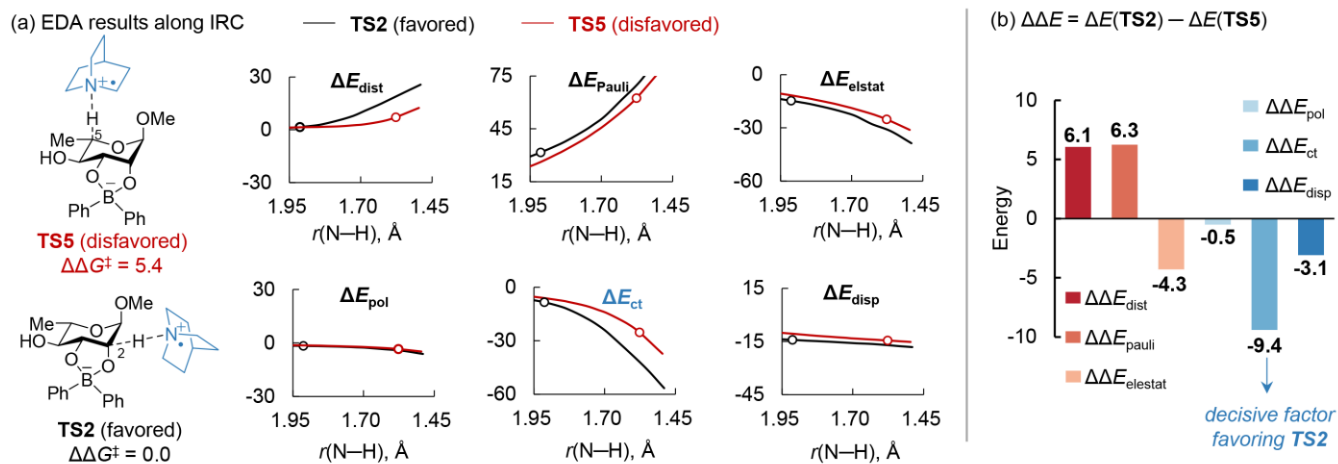

(c) Orbital interactions between 1/BPh<sub>2</sub> anion and quinuclidine radical cation in HAT transition states (**TS5** versus **TS2**)

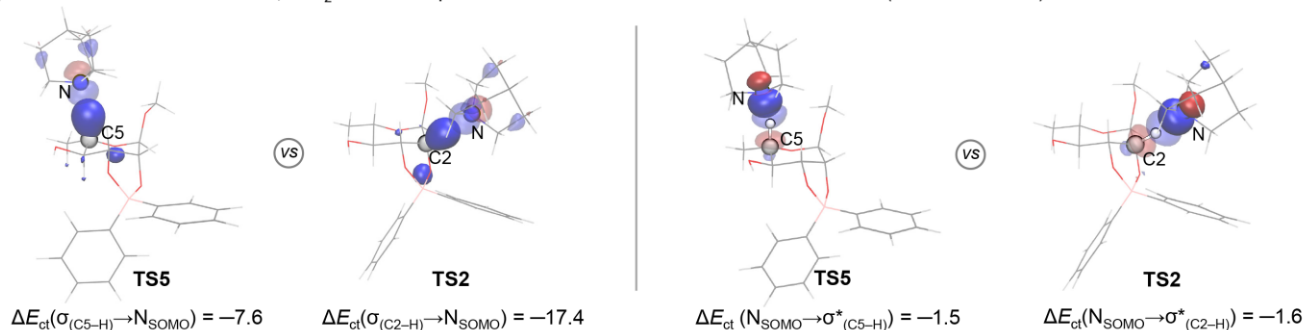

**Fig. S8** EDA results for HAT transition states (**TS5** versus **TS2**). (a) EDA energy terms along IRC. (b) The bar chart of difference in six energy terms. (c) Comparison of orbital interactions. All energies are given in kcal/mol.

### Relationships among HAT Barriers, Charge Transfer and C–H $\sigma$ Orbital Energy

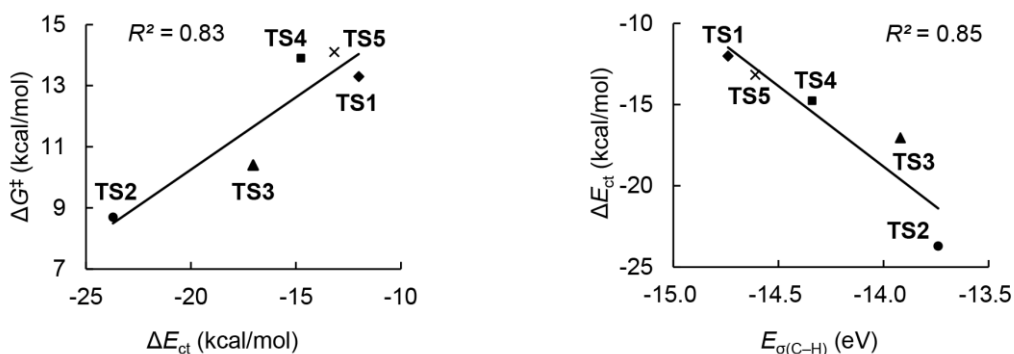

**Fig. S9** Plots for  $\Delta G^\ddagger$  against  $\Delta E_{\text{ct}}$  and  $\Delta E_{\text{ct}}$  against  $E_{\sigma(\text{C-H})}$ .



## Computed Bond Dissociation Energy and $\sigma$ Orbital Energies of C–H Bonds

**Table S1. Computed BDEs and  $E_{\sigma(\text{C-H})}$**

| 1 (w/ Ph <sub>2</sub> BOH) |                   |                                  | 1/BPh <sub>2</sub> anion |                   |                                  |
|----------------------------|-------------------|----------------------------------|--------------------------|-------------------|----------------------------------|
| position                   | BDE<br>(kcal/mol) | $E_{\sigma(\text{C-H})}$<br>(eV) | position                 | BDE<br>(kcal/mol) | $E_{\sigma(\text{C-H})}$<br>(eV) |
| C <sub>1</sub> –H          | 98.0              | –18.18                           | C <sub>1</sub> –H        | 97.1              | –14.74                           |
| C <sub>2</sub> –H          | 95.0              | –17.60                           | C <sub>2</sub> –H        | 90.6              | –13.74                           |
| C <sub>3</sub> –H          | 94.9              | –17.68                           | C <sub>3</sub> –H        | 91.6              | –13.92                           |
| C <sub>4</sub> –H          | 96.1              | –17.87                           | C <sub>4</sub> –H        | 92.4              | –14.34                           |
| C <sub>5</sub> –H          | 95.1              | –17.73                           | C <sub>5</sub> –H        | 94.8              | –14.61                           |

## Conformational Search for Other Transition States

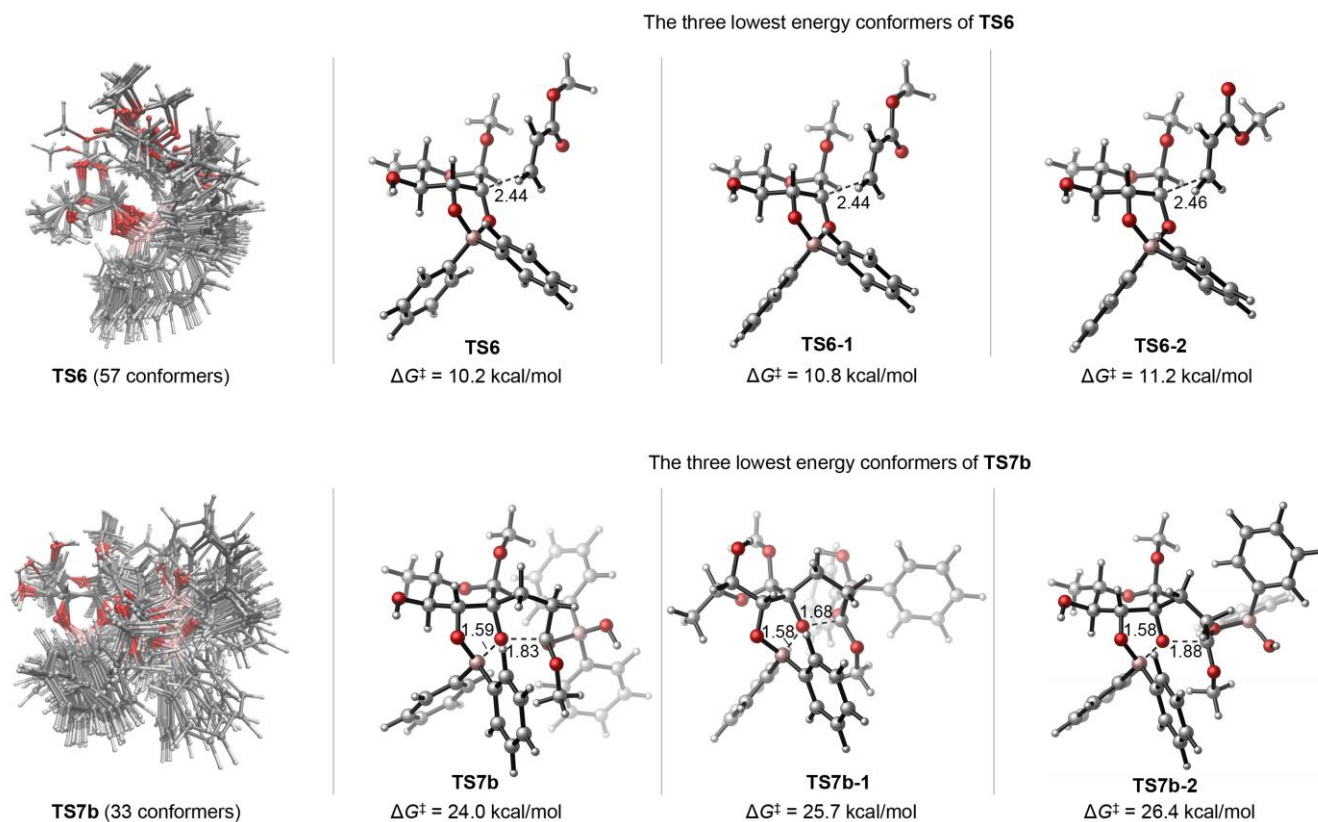

**Fig. S10** Results of conformational search for **TS6** and **TS7b**.

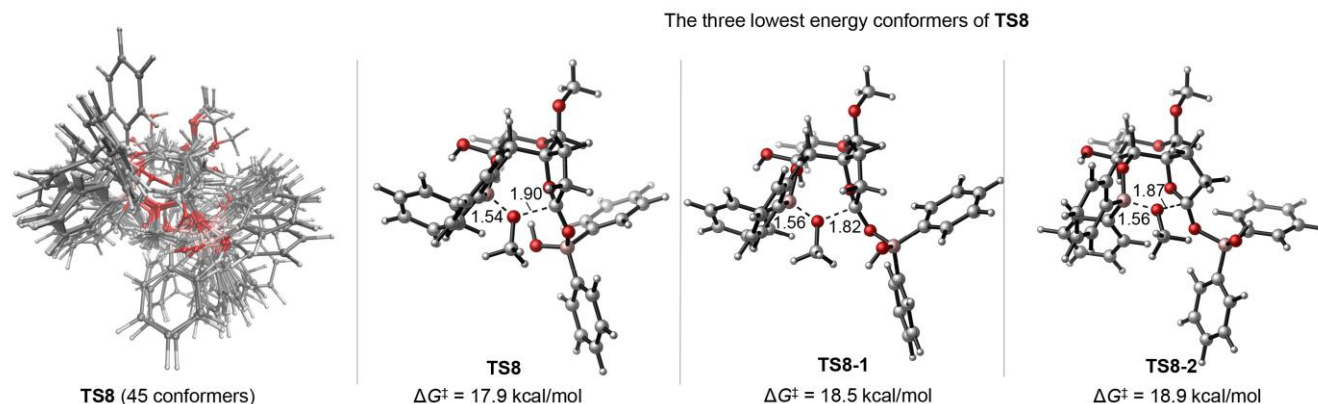

**Fig. S11** Results of conformational search for **TS8**.

### Energy Terms of EDA along IRC

**Table S2.** EDA energy terms of HAT transition state **TS1**

| Energy terms<br>(in kcal/mol)<br>$r(\text{N-H})$<br>In <b>TS1</b> (in Å) | $\Delta E_{\text{dist}}$ | $\Delta E_{\text{Pauli}}$ | $\Delta E_{\text{ct}}$ | $\Delta E_{\text{elstat}}$ | $\Delta E_{\text{pol}}$ | $\Delta E_{\text{disp}}$ |
|--------------------------------------------------------------------------|--------------------------|---------------------------|------------------------|----------------------------|-------------------------|--------------------------|
| 1.49                                                                     | 11.76                    | 74.65                     | -35.51                 | -30.37                     | -4.81                   | -14.20                   |
| 1.56 (TS)                                                                | 7.38                     | 63.02                     | -25.94                 | -25.91                     | -3.67                   | -13.56                   |
| 1.62                                                                     | 4.15                     | 53.42                     | -18.61                 | -22.26                     | -2.92                   | -12.97                   |
| 1.69                                                                     | 2.28                     | 45.28                     | -13.31                 | -19.38                     | -2.38                   | -12.40                   |
| 1.72                                                                     | 1.62                     | 41.43                     | -11.19                 | -17.97                     | -2.17                   | -12.07                   |
| 1.77                                                                     | 1.21                     | 36.93                     | -9.16                  | -16.40                     | -1.93                   | -11.61                   |
| 1.83                                                                     | 0.85                     | 31.98                     | -7.22                  | -14.66                     | -1.70                   | -11.03                   |
| 1.86                                                                     | 0.74                     | 29.77                     | -6.50                  | -13.88                     | -1.60                   | -10.73                   |
| 1.91                                                                     | 0.56                     | 26.10                     | -5.40                  | -12.57                     | -1.44                   | -10.19                   |
| 1.96                                                                     | 0.41                     | 23.01                     | -4.56                  | -11.46                     | -1.31                   | -9.69                    |

**Table S3.** EDA energy terms of HAT transition state **TS2**

| Energy terms<br>(in kcal/mol)<br>$r(\text{N-H})$<br>In <b>TS2</b> (in Å) | $\Delta E_{\text{dist}}$ | $\Delta E_{\text{Pauli}}$ | $\Delta E_{\text{ct}}$ | $\Delta E_{\text{elstat}}$ | $\Delta E_{\text{pol}}$ | $\Delta E_{\text{disp}}$ |
|--------------------------------------------------------------------------|--------------------------|---------------------------|------------------------|----------------------------|-------------------------|--------------------------|
| 1.49                                                                     | 25.67                    | 88.01                     | -56.52                 | -38.64                     | -6.20                   | -18.15                   |
| 1.56                                                                     | 20.09                    | 72.39                     | -44.14                 | -31.89                     | -4.36                   | -17.26                   |
| 1.58                                                                     | 18.63                    | 68.84                     | -41.08                 | -30.36                     | -4.01                   | -17.05                   |
| 1.63                                                                     | 14.90                    | 61.69                     | -39.03                 | -27.91                     | -3.50                   | -16.42                   |
| 1.69                                                                     | 10.75                    | 52.48                     | -25.92                 | -23.31                     | -2.72                   | -15.97                   |
| 1.72                                                                     | 8.01                     | 47.71                     | -21.17                 | -21.26                     | -2.42                   | -15.63                   |
| 1.77                                                                     | 5.83                     | 43.15                     | -17.02                 | -19.37                     | -2.16                   | -15.25                   |
| 1.83                                                                     | 3.36                     | 37.76                     | -12.42                 | -17.14                     | -1.90                   | -14.77                   |
| 1.86                                                                     | 2.40                     | 35.17                     | -10.50                 | -16.08                     | -1.78                   | -14.50                   |
| 1.91 (TS)                                                                | 1.60                     | 31.61                     | -8.39                  | -14.66                     | -1.64                   | -14.07                   |
| 1.96                                                                     | 1.06                     | 28.63                     | -6.96                  | -13.48                     | -1.53                   | -13.64                   |

**Table S4. EDA energy terms of HAT transition state TS3**

| $r(\text{N-H})$<br>In <b>TS3</b> (in Å) | Energy terms<br>(in kcal/mol) | $\Delta E_{\text{dist}}$ | $\Delta E_{\text{Pauli}}$ | $\Delta E_{\text{ct}}$ | $\Delta E_{\text{elstat}}$ | $\Delta E_{\text{pol}}$ | $\Delta E_{\text{disp}}$ |
|-----------------------------------------|-------------------------------|--------------------------|---------------------------|------------------------|----------------------------|-------------------------|--------------------------|
| 1.49                                    |                               | 17.02                    | 79.66                     | -44.13                 | -33.04                     | -5.14                   | -17.11                   |
| 1.56                                    |                               | 12.41                    | 66.45                     | -33.34                 | -27.89                     | -3.83                   | -16.39                   |
| 1.62                                    |                               | 9.51                     | 58.14                     | -26.47                 | -24.69                     | -3.16                   | -15.89                   |
| 1.69                                    |                               | 6.30                     | 48.55                     | -18.91                 | -21.03                     | -2.52                   | -15.23                   |
| 1.72                                    |                               | 5.49                     | 45.54                     | -16.73                 | -19.90                     | -2.35                   | -14.98                   |
| 1.77 (TS)                               |                               | 4.35                     | 40.92                     | -13.65                 | -18.18                     | -2.12                   | -14.56                   |
| 1.83                                    |                               | 3.30                     | 35.71                     | -10.54                 | -16.25                     | -1.88                   | -14.01                   |
| 1.86                                    |                               | 2.94                     | 32.95                     | -9.11                  | -15.24                     | -1.77                   | -13.67                   |
| 1.91                                    |                               | 2.56                     | 29.63                     | -7.61                  | -14.03                     | -1.64                   | -13.21                   |
| 1.97                                    |                               | 2.13                     | 26.62                     | -6.32                  | -12.91                     | -1.54                   | -12.77                   |

**Table S5. EDA energy terms of HAT transition state TS4**

| $r(\text{N-H})$<br>In <b>TS4</b> (in Å) | Energy terms<br>(in kcal/mol) | $\Delta E_{\text{dist}}$ | $\Delta E_{\text{Pauli}}$ | $\Delta E_{\text{ct}}$ | $\Delta E_{\text{elstat}}$ | $\Delta E_{\text{pol}}$ | $\Delta E_{\text{disp}}$ |
|-----------------------------------------|-------------------------------|--------------------------|---------------------------|------------------------|----------------------------|-------------------------|--------------------------|
| 1.49                                    |                               | 14.43                    | 91.66                     | -39.50                 | -38.08                     | -5.93                   | -22.56                   |
| 1.56                                    |                               | 9.82                     | 77.94                     | -28.72                 | -32.74                     | -4.56                   | -21.82                   |
| 1.58 (TS)                               |                               | 8.96                     | 71.48                     | -25.08                 | -30.91                     | -4.16                   | -21.55                   |
| 1.62                                    |                               | 7.00                     | 65.90                     | -21.88                 | -29.24                     | -3.83                   | -21.29                   |
| 1.69                                    |                               | 5.30                     | 56.71                     | -16.65                 | -26.15                     | -3.30                   | -20.70                   |
| 1.72                                    |                               | 4.68                     | 51.94                     | -14.32                 | -24.53                     | -3.06                   | -20.31                   |
| 1.77                                    |                               | 4.27                     | 47.50                     | -12.04                 | -22.61                     | -2.80                   | -19.74                   |
| 1.83                                    |                               | 3.92                     | 42.13                     | -9.84                  | -20.49                     | -2.53                   | -19.02                   |
| 1.86                                    |                               | 3.73                     | 39.37                     | -8.94                  | -19.62                     | -2.44                   | -18.74                   |
| 1.91                                    |                               | 3.56                     | 36.42                     | -7.63                  | -17.96                     | -2.24                   | -18.05                   |
| 1.96                                    |                               | 3.34                     | 32.96                     | -6.54                  | -16.54                     | -2.09                   | -17.45                   |

**Table S6. EDA energy terms of HAT transition state TS5**

| $r(\text{N-H})$<br>In <b>TS5</b> (in Å) | Energy terms<br>(in kcal/mol) | $\Delta E_{\text{dist}}$ | $\Delta E_{\text{Pauli}}$ | $\Delta E_{\text{ct}}$ | $\Delta E_{\text{elstat}}$ | $\Delta E_{\text{pol}}$ | $\Delta E_{\text{disp}}$ |
|-----------------------------------------|-------------------------------|--------------------------|---------------------------|------------------------|----------------------------|-------------------------|--------------------------|
| 1.50                                    |                               | 12.43                    | 77.50                     | -37.27                 | -31.09                     | -4.80                   | -15.21                   |
| 1.58 (TS)                               |                               | 7.15                     | 62.48                     | -25.30                 | -25.18                     | -3.39                   | -14.40                   |
| 1.62                                    |                               | 5.00                     | 55.81                     | -20.29                 | -22.58                     | -2.89                   | -14.00                   |
| 1.69                                    |                               | 3.08                     | 47.12                     | -14.75                 | -19.34                     | -2.33                   | -13.36                   |
| 1.72                                    |                               | 2.65                     | 43.24                     | -12.76                 | -17.93                     | -2.12                   | -12.98                   |
| 1.77                                    |                               | 2.03                     | 38.62                     | -10.46                 | -16.19                     | -1.88                   | -12.49                   |
| 1.83                                    |                               | 1.68                     | 32.88                     | -8.16                  | -14.10                     | -1.61                   | -11.74                   |
| 1.85                                    |                               | 1.60                     | 30.76                     | -7.41                  | -13.32                     | -1.52                   | -11.42                   |
| 1.91                                    |                               | 1.42                     | 26.21                     | -6.04                  | -11.63                     | -1.33                   | -10.60                   |
| 1.96                                    |                               | 1.16                     | 22.77                     | -5.05                  | -10.31                     | -1.19                   | -9.91                    |

## Cartesian Coordinates (Å) and Energies of the Optimized Structures

1

M06-2X SCF energy: -650.53483641 a.u.  
M06-2X enthalpy: -650.298768 a.u.  
M06-2X free energy: -650.349501 a.u.  
M06-2X SCF energy in solution: -651.29694262 a.u.  
M06-2X enthalpy in solution: -651.060874 a.u.  
M06-2X free energy in solution: -651.111607 a.u.  
Three lowest frequencies (cm-1): 74.6344 93.9196 129.9765

Cartesian coordinates

| ATOM | X         | Y         | Z         |
|------|-----------|-----------|-----------|
| C    | -0.096791 | 1.358565  | 0.071522  |
| C    | 1.033317  | -0.758277 | -0.612289 |
| C    | 1.243037  | 0.627972  | -0.027928 |
| H    | -0.514706 | 1.446857  | -0.948246 |
| H    | 0.637397  | -0.644255 | -1.638241 |
| H    | 1.647720  | 0.510601  | 0.993845  |
| O    | -0.977216 | 0.591957  | 0.886139  |
| C    | -1.246088 | -0.696848 | 0.408048  |
| H    | -1.886072 | -1.160677 | 1.180275  |
| O    | -1.893468 | -0.674044 | -0.824006 |
| C    | -3.143640 | -0.025269 | -0.794606 |
| H    | -3.039490 | 1.050183  | -0.578504 |
| H    | -3.604972 | -0.148744 | -1.782250 |
| H    | -3.804467 | -0.473011 | -0.031539 |
| C    | 0.028282  | 2.731231  | 0.693413  |
| H    | 0.670601  | 3.373451  | 0.074833  |
| H    | -0.959581 | 3.206375  | 0.770670  |
| H    | 0.462548  | 2.655126  | 1.701763  |
| O    | 2.163827  | 1.285171  | -0.869797 |
| H    | 2.570160  | 2.012169  | -0.380843 |
| O    | 2.236167  | -1.489790 | -0.605335 |
| H    | 2.930754  | -0.885000 | -0.906396 |
| C    | 0.021286  | -1.527205 | 0.228216  |
| H    | -0.257153 | -2.457878 | -0.298133 |
| O    | 0.551085  | -1.797161 | 1.499506  |
| H    | 1.467685  | -2.075284 | 1.352456  |

2

M06-2X SCF energy: -306.10893708 a.u.  
M06-2X enthalpy: -306.005194 a.u.  
M06-2X free energy: -306.043092 a.u.  
M06-2X SCF energy in solution: -306.46736807 a.u.  
M06-2X enthalpy in solution: -306.363625 a.u.  
M06-2X free energy in solution: -306.401523 a.u.  
Three lowest frequencies (cm-1): 73.3894 175.8287 205.3457

Cartesian coordinates

| ATOM | X         | Y        | Z         |
|------|-----------|----------|-----------|
| C    | -1.314282 | 1.131332 | -0.000352 |
| C    | 0.018944  | 1.126855 | 0.000354  |
| H    | -1.876777 | 2.067842 | -0.000838 |
| H    | -1.877686 | 0.195530 | -0.000463 |
| H    | 0.596869  | 0.200162 | 0.000789  |
| C    | 0.848913  | 2.359826 | 0.000437  |
| O    | 2.055229  | 2.350117 | 0.000694  |
| O    | 0.128635  | 3.482102 | 0.000191  |
| C    | 0.862143  | 4.701269 | 0.000052  |
| H    | 0.120575  | 5.506585 | -0.000380 |
| H    | 1.495657  | 4.772559 | 0.894975  |
| H    | 1.496165  | 4.772063 | -0.894547 |

3

M06-2X SCF energy: -841.10190398 a.u.  
M06-2X enthalpy: -840.817176 a.u.  
M06-2X free energy: -840.874575 a.u.  
M06-2X SCF energy in solution: -842.07544720 a.u.  
M06-2X enthalpy in solution: -841.790719 a.u.  
M06-2X free energy in solution: -841.848118 a.u.  
Three lowest frequencies (cm-1): 66.7830 78.9069 86.2632

Cartesian coordinates

| ATOM | X        | Y         | Z         |
|------|----------|-----------|-----------|
| C    | 3.283028 | 0.777276  | 0.277303  |
| C    | 1.346898 | -0.736102 | 0.726735  |
| C    | 1.952725 | 0.626492  | 1.016786  |
| H    | 3.972131 | 0.001215  | 0.657610  |
| H    | 2.053799 | -1.507225 | 1.087350  |
| H    | 1.253427 | 1.397809  | 0.647559  |
| O    | 3.064213 | 0.582831  | -1.117392 |
| C    | 2.533189 | -0.662380 | -1.464879 |
| H    | 2.378050 | -0.618476 | -2.558379 |
| O    | 3.373073 | -1.713882 | -1.121053 |
| C    | 4.613307 | -1.691036 | -1.794376 |
| H    | 5.200442 | -0.797600 | -1.529282 |
| H    | 5.168314 | -2.588263 | -1.495218 |
| H    | 4.465928 | -1.704444 | -2.888019 |
| C    | 3.899951 | 2.145837  | 0.457525  |
| H    | 3.219037 | 2.922514  | 0.078429  |
| H    | 4.101721 | 2.335450  | 1.520941  |
| H    | 4.850430 | 2.211667  | -0.089687 |
| O    | 2.105991 | 0.703178  | 2.416286  |
| H    | 2.140567 | 1.632271  | 2.678132  |
| O    | 0.090364 | -0.870586 | 1.334793  |
| C    | 1.192494 | -0.927893 | -0.778092 |
| O    | 0.269610 | 0.056643  | -1.265051 |
| C    | 0.564406 | -2.276332 | -1.157977 |



|   |           |           |           |
|---|-----------|-----------|-----------|
| C | -0.925880 | -1.958259 | -1.208356 |
| H | 0.930814  | -2.578314 | -2.149884 |
| C | -0.963718 | -0.463000 | -1.436073 |
| O | -1.897569 | 0.223585  | -1.734585 |
| H | 0.828583  | -3.059333 | -0.438285 |
| H | 0.184599  | -0.533745 | 2.238648  |
| H | -1.478336 | -2.465887 | -2.008619 |
| H | -1.431185 | -2.154411 | -0.252991 |

4

|                                  |                     |         |         |
|----------------------------------|---------------------|---------|---------|
| M06-2X SCF energy:               | -1137.15583917 a.u. |         |         |
| M06-2X enthalpy:                 | -1136.744922 a.u.   |         |         |
| M06-2X free energy:              | -1136.821307 a.u.   |         |         |
| M06-2X SCF energy in solution:   | -1138.43804469 a.u. |         |         |
| M06-2X enthalpy in solution:     | -1138.027128 a.u.   |         |         |
| M06-2X free energy in solution:  | -1138.103513 a.u.   |         |         |
| Three lowest frequencies (cm-1): | 17.0443             | 30.4799 | 36.1981 |

#### Cartesian coordinates

| ATOM | X         | Y         | Z         |
|------|-----------|-----------|-----------|
| C    | 3.310683  | 0.413646  | 0.423766  |
| C    | 1.119611  | -0.593978 | 1.117799  |
| C    | 1.969649  | 0.673276  | 1.091526  |
| H    | 3.830961  | -0.396479 | 0.968262  |
| H    | 1.543260  | -1.269605 | 1.884144  |
| H    | 1.442738  | 1.421363  | 0.468711  |
| O    | 3.055478  | -0.000651 | -0.915288 |
| C    | 2.377538  | -1.222233 | -1.024907 |
| H    | 2.188236  | -1.348754 | -2.106878 |
| O    | 3.150542  | -2.280034 | -0.539322 |
| C    | 4.384992  | -2.427258 | -1.197230 |
| H    | 5.066898  | -1.587588 | -0.984609 |
| H    | 4.844530  | -3.358026 | -0.840499 |
| H    | 4.246904  | -2.492936 | -2.291461 |
| C    | 4.189267  | 1.643122  | 0.371678  |
| H    | 4.397918  | 1.993803  | 1.390794  |
| H    | 5.140693  | 1.420375  | -0.131725 |
| H    | 3.679262  | 2.447897  | -0.179518 |
| O    | 2.168974  | 1.161818  | 2.397736  |
| H    | 1.292164  | 1.181978  | 2.808301  |
| O    | -0.210811 | -0.276678 | 1.411044  |
| C    | 1.053886  | -1.252006 | -0.265220 |
| H    | 0.776923  | -2.320959 | -0.154474 |
| O    | 0.063849  | -0.524681 | -0.919966 |
| C    | -2.256303 | -1.073440 | 0.091407  |
| C    | -3.210618 | -1.000019 | -0.939744 |
| C    | -2.462520 | -2.059615 | 1.069228  |
| C    | -4.305099 | -1.864370 | -1.001557 |
| H    | -3.094425 | -0.238144 | -1.718881 |

|   |           |           |           |
|---|-----------|-----------|-----------|
| C | -3.555770 | -2.931628 | 1.025477  |
| H | -1.740013 | -2.134442 | 1.886803  |
| C | -4.482414 | -2.837527 | -0.013523 |
| H | -5.026876 | -1.780243 | -1.817835 |
| H | -3.687126 | -3.687199 | 1.804403  |
| H | -5.338680 | -3.514431 | -0.053202 |
| C | -1.345246 | 1.464676  | -0.178121 |
| C | -0.673777 | 2.232073  | -1.144170 |
| C | -2.365779 | 2.110693  | 0.541267  |
| C | -0.995244 | 3.571532  | -1.382941 |
| H | 0.126705  | 1.751986  | -1.714775 |
| C | -2.694408 | 3.450725  | 0.321764  |
| H | -2.925888 | 1.547169  | 1.296078  |
| C | -2.008440 | 4.188228  | -0.647081 |
| H | -0.454542 | 4.137902  | -2.145626 |
| H | -3.490659 | 3.923697  | 0.902149  |
| H | -2.264235 | 5.234606  | -0.828007 |
| B | -0.935812 | -0.097109 | 0.105540  |

5a

|                                  |                    |          |          |
|----------------------------------|--------------------|----------|----------|
| M06-2X SCF energy:               | -328.91713790 a.u. |          |          |
| M06-2X enthalpy:                 | -328.714158 a.u.   |          |          |
| M06-2X free energy:              | -328.752715 a.u.   |          |          |
| M06-2X SCF energy in solution:   | -329.28354200 a.u. |          |          |
| M06-2X enthalpy in solution:     | -329.080562 a.u.   |          |          |
| M06-2X free energy in solution:  | -329.119119 a.u.   |          |          |
| Three lowest frequencies (cm-1): | 41.4785            | 304.3235 | 313.6103 |

Cartesian coordinates

| ATOM | X         | Y         | Z         |
|------|-----------|-----------|-----------|
| C    | -0.766279 | -0.808735 | 1.118020  |
| C    | 1.317841  | -0.001085 | 0.000318  |
| C    | 0.786691  | -0.857072 | 1.157313  |
| H    | -1.169543 | -0.381190 | 2.048556  |
| H    | -1.188573 | -1.819812 | 1.015412  |
| H    | 1.168605  | -0.469354 | 2.114217  |
| H    | 1.152514  | -1.890283 | 1.055443  |
| C    | -0.763888 | 1.373406  | 0.140697  |
| H    | -1.165109 | 1.963514  | -0.697148 |
| H    | -1.186445 | 1.793026  | 1.066198  |
| C    | 0.788850  | 1.429630  | 0.164374  |
| H    | 1.172121  | 2.066392  | -0.647581 |
| H    | 1.154003  | 1.854467  | 1.112033  |
| H    | 2.417560  | -0.001938 | 0.000790  |
| C    | 0.787009  | -0.574070 | -1.320322 |
| H    | 1.151826  | 0.032154  | -2.163709 |
| H    | 1.169183  | -1.596083 | -1.465107 |
| C    | -0.765715 | -0.563618 | -1.259353 |
| H    | -1.187462 | 0.030044  | -2.084498 |

|   |           |           |           |
|---|-----------|-----------|-----------|
| H | -1.169563 | -1.583064 | -1.353223 |
| N | -1.251040 | 0.000973  | 0.000149  |

5b

|                                  |                    |          |          |
|----------------------------------|--------------------|----------|----------|
| M06-2X SCF energy:               | -328.72185941 a.u. |          |          |
| M06-2X enthalpy:                 | -328.518755 a.u.   |          |          |
| M06-2X free energy:              | -328.558007 a.u.   |          |          |
| M06-2X SCF energy in solution:   | -329.08785726 a.u. |          |          |
| M06-2X enthalpy in solution:     | -328.884753 a.u.   |          |          |
| M06-2X free energy in solution:  | -328.924005 a.u.   |          |          |
| Three lowest frequencies (cm-1): | 44.3730            | 306.3753 | 310.2778 |

Cartesian coordinates

| ATOM | X         | Y         | Z         |
|------|-----------|-----------|-----------|
| C    | 0.948452  | 1.191538  | -0.565839 |
| C    | -1.270462 | 0.112115  | -0.034402 |
| C    | -0.625232 | 1.366389  | -0.627108 |
| H    | 1.410376  | 1.955301  | 0.069290  |
| H    | 1.388813  | 1.196576  | -1.569025 |
| H    | -0.903259 | 2.260247  | -0.054538 |
| H    | -0.923980 | 1.507064  | -1.673546 |
| C    | 0.772063  | -0.193498 | 1.415570  |
| H    | 1.088653  | -1.165449 | 1.809843  |
| H    | 1.243236  | 0.626049  | 1.969697  |
| C    | -0.806019 | -0.057409 | 1.413584  |
| H    | -1.238681 | -0.960210 | 1.862978  |
| H    | -1.085719 | 0.811879  | 2.021982  |
| H    | -2.365633 | 0.209554  | -0.064029 |
| C    | -0.838389 | -1.109921 | -0.846919 |
| H    | -1.269605 | -2.030445 | -0.433486 |
| H    | -1.144003 | -1.014062 | -1.896381 |
| C    | 0.741301  | -1.214230 | -0.783798 |
| H    | 1.060613  | -2.146208 | -0.304367 |
| H    | 1.188387  | -1.112568 | -1.778858 |
| N    | 1.145788  | -0.101090 | 0.030558  |

5c

|                                  |                    |          |          |
|----------------------------------|--------------------|----------|----------|
| M06-2X SCF energy:               | -329.39125656 a.u. |          |          |
| M06-2X enthalpy:                 | -329.172942 a.u.   |          |          |
| M06-2X free energy:              | -329.210943 a.u.   |          |          |
| M06-2X SCF energy in solution:   | -329.75789804 a.u. |          |          |
| M06-2X enthalpy in solution:     | -329.539583 a.u.   |          |          |
| M06-2X free energy in solution:  | -329.577584 a.u.   |          |          |
| Three lowest frequencies (cm-1): | 97.9544            | 290.0189 | 296.4187 |

Cartesian coordinates

| ATOM | X | Y | Z |
|------|---|---|---|
|------|---|---|---|

|   |           |           |           |
|---|-----------|-----------|-----------|
| C | -0.743068 | -0.742962 | 1.211086  |
| C | 1.311023  | -0.001660 | -0.000033 |
| C | 0.777569  | -0.938356 | 1.092010  |
| H | -1.025342 | -0.132045 | 2.077063  |
| H | -1.295672 | -1.688549 | 1.246185  |
| H | 1.250882  | -0.715589 | 2.057367  |
| H | 1.011316  | -1.981506 | 0.836759  |
| C | -0.740181 | 1.420970  | 0.037996  |
| H | -1.021992 | 1.868118  | -0.923181 |
| H | -1.291650 | 1.924605  | 0.839957  |
| C | 0.780278  | 1.413097  | 0.267282  |
| H | 1.253673  | 2.138573  | -0.407194 |
| H | 1.013898  | 1.710321  | 1.299402  |
| H | 2.408105  | -0.002666 | 0.000538  |
| C | 0.778779  | -0.476183 | -1.358209 |
| H | 1.011673  | 0.269529  | -2.131378 |
| H | 1.252193  | -1.422513 | -1.650848 |
| C | -0.741610 | -0.677780 | -1.249872 |
| H | -1.293039 | -0.235536 | -2.087306 |
| H | -1.023880 | -1.733272 | -1.154099 |
| N | -1.220369 | 0.000706  | -0.000945 |
| H | -2.246348 | 0.001428  | -0.001798 |

#### TS1

|                                  |                     |        |         |
|----------------------------------|---------------------|--------|---------|
| M06-2X SCF energy:               | -1465.88021939 a.u. |        |         |
| M06-2X enthalpy:                 | -1465.268720 a.u.   |        |         |
| M06-2X free energy:              | -1465.364044 a.u.   |        |         |
| M06-2X SCF energy in solution:   | -1467.52251413 a.u. |        |         |
| M06-2X enthalpy in solution:     | -1466.911015 a.u.   |        |         |
| M06-2X free energy in solution:  | -1467.006339 a.u.   |        |         |
| Three lowest frequencies (cm-1): | -663.1492           | 9.3111 | 17.2707 |
| Imaginary frequency:             | -663.1492 cm-1      |        |         |

#### Cartesian coordinates

| ATOM | X         | Y        | Z         |
|------|-----------|----------|-----------|
| C    | -0.746796 | 3.501023 | -0.402100 |
| C    | 0.804085  | 1.839434 | -1.472338 |
| C    | 0.681045  | 2.980625 | -0.462667 |
| H    | -1.061169 | 3.814539 | -1.415001 |
| H    | 0.741388  | 2.269963 | -2.488321 |
| H    | 0.919050  | 2.574570 | 0.538999  |
| O    | -1.586040 | 2.412651 | 0.027269  |
| C    | -1.630651 | 1.362084 | -0.860920 |
| O    | -2.345213 | 1.625404 | -1.999051 |
| C    | -3.557441 | 2.337302 | -1.813370 |
| H    | -3.369781 | 3.396187 | -1.580246 |
| H    | -4.113714 | 2.266113 | -2.755096 |
| H    | -4.153915 | 1.893944 | -1.000624 |
| C    | -0.932816 | 4.636282 | 0.575010  |

|   |           |           |           |
|---|-----------|-----------|-----------|
| H | -0.299445 | 5.482181  | 0.278452  |
| H | -1.981621 | 4.963893  | 0.592518  |
| H | -0.642552 | 4.315953  | 1.586732  |
| O | 1.550011  | 4.034386  | -0.798524 |
| H | 2.422460  | 3.633470  | -0.925786 |
| O | 2.003023  | 1.149184  | -1.286763 |
| C | -0.275053 | 0.772677  | -1.225226 |
| H | -0.414989 | 0.155801  | -2.135985 |
| O | 0.248685  | 0.040311  | -0.164794 |
| C | 2.148800  | -1.410671 | -1.118493 |
| C | 1.887814  | -2.651457 | -0.507873 |
| C | 2.733632  | -1.444316 | -2.392929 |
| C | 2.184579  | -3.862697 | -1.134917 |
| H | 1.438933  | -2.670105 | 0.492101  |
| C | 3.045352  | -2.649729 | -3.032066 |
| H | 2.943433  | -0.494965 | -2.893931 |
| C | 2.769822  | -3.864953 | -2.404737 |
| H | 1.965790  | -4.809064 | -0.633996 |
| H | 3.502861  | -2.641622 | -4.024588 |
| H | 3.008406  | -4.808533 | -2.900305 |
| C | 2.477963  | 0.137722  | 1.077140  |
| C | 1.772281  | 0.490626  | 2.239039  |
| C | 3.863089  | -0.057800 | 1.213680  |
| C | 2.409649  | 0.644428  | 3.474261  |
| H | 0.692754  | 0.652341  | 2.162542  |
| C | 4.516708  | 0.101897  | 2.437588  |
| H | 4.450328  | -0.346529 | 0.334858  |
| C | 3.788160  | 0.451955  | 3.577511  |
| H | 1.830069  | 0.915926  | 4.360220  |
| H | 5.596315  | -0.052172 | 2.507103  |
| H | 4.292125  | 0.572529  | 4.538963  |
| B | 1.734221  | -0.014417 | -0.370136 |
| N | -2.688830 | -0.832939 | 0.391222  |
| C | -4.150089 | -0.746345 | 0.407197  |
| C | -3.491203 | -2.953830 | 1.403577  |
| C | -4.681321 | -2.122895 | 0.909514  |
| H | -4.429370 | 0.076700  | 1.076300  |
| H | -4.490632 | -0.522763 | -0.611435 |
| H | -5.405714 | -1.959360 | 1.718326  |
| H | -5.195304 | -2.645795 | 0.091284  |
| C | -2.104425 | -0.888356 | 1.732618  |
| H | -1.018142 | -0.960560 | 1.606337  |
| H | -2.349639 | 0.046559  | 2.252584  |
| C | -2.715846 | -2.133820 | 2.441508  |
| H | -1.906713 | -2.729980 | 2.883871  |
| H | -3.387817 | -1.815895 | 3.250665  |
| H | -3.846887 | -3.892222 | 1.850239  |
| C | -2.570186 | -3.251314 | 0.214652  |
| H | -1.656016 | -3.754919 | 0.559273  |
| H | -3.069888 | -3.908257 | -0.509505 |
| C | -2.200629 | -1.905326 | -0.478677 |



|   |           |           |           |
|---|-----------|-----------|-----------|
| H | -1.116408 | -1.779115 | -0.587503 |
| H | -2.691635 | -1.790941 | -1.453738 |
| H | -2.174715 | 0.484015  | -0.260178 |

TS2

|                                  |                     |         |         |
|----------------------------------|---------------------|---------|---------|
| M06-2X SCF energy:               | -1465.89015806 a.u. |         |         |
| M06-2X enthalpy:                 | -1465.276665 a.u.   |         |         |
| M06-2X free energy:              | -1465.370331 a.u.   |         |         |
| M06-2X SCF energy in solution:   | -1467.53346566 a.u. |         |         |
| M06-2X enthalpy in solution:     | -1466.919973 a.u.   |         |         |
| M06-2X free energy in solution:  | -1467.013639 a.u.   |         |         |
| Three lowest frequencies (cm-1): | -123.7369           | 16.4672 | 26.0405 |
| Imaginary frequency:             | -123.7369 cm-1      |         |         |

Cartesian coordinates

| ATOM | X         | Y         | Z         |
|------|-----------|-----------|-----------|
| C    | -1.750958 | 3.282601  | 0.411991  |
| C    | -0.614626 | 1.105446  | 0.923158  |
| C    | -1.898089 | 1.922263  | 1.079141  |
| H    | -0.888719 | 3.809583  | 0.860915  |
| H    | 0.147439  | 1.549978  | 1.588852  |
| H    | -2.707578 | 1.387190  | 0.545369  |
| O    | -1.506642 | 3.066999  | -0.975645 |
| C    | -0.303780 | 2.414124  | -1.263623 |
| H    | -0.311092 | 2.256441  | -2.356986 |
| O    | 0.804807  | 3.176050  | -0.883156 |
| C    | 0.888069  | 4.424738  | -1.530272 |
| H    | 0.047023  | 5.081888  | -1.257414 |
| H    | 1.827793  | 4.897624  | -1.218097 |
| H    | 0.894022  | 4.301310  | -2.627513 |
| C    | -2.993637 | 4.135038  | 0.533717  |
| H    | -3.219475 | 4.315289  | 1.592635  |
| H    | -2.850055 | 5.101455  | 0.030052  |
| H    | -3.850036 | 3.620880  | 0.071954  |
| O    | -2.215625 | 2.089141  | 2.438648  |
| H    | -2.198698 | 1.204108  | 2.831609  |
| O    | -0.833854 | -0.238173 | 1.237445  |
| C    | -0.171065 | 1.077392  | -0.542173 |
| O    | -0.921586 | 0.072430  | -1.105413 |
| C    | -0.168447 | -2.228912 | -0.221269 |
| C    | 0.112295  | -2.756113 | -1.492924 |
| C    | 0.482910  | -2.823364 | 0.871944  |
| C    | 1.018605  | -3.803450 | -1.673946 |
| H    | -0.375808 | -2.317048 | -2.369062 |
| C    | 1.389026  | -3.876386 | 0.708338  |
| H    | 0.291169  | -2.430324 | 1.875350  |
| C    | 1.666293  | -4.365395 | -0.570142 |
| H    | 1.227249  | -4.181810 | -2.677760 |
| H    | 1.885166  | -4.314497 | 1.578152  |

|   |           |           |           |
|---|-----------|-----------|-----------|
| H | 2.380623  | -5.180247 | -0.705630 |
| C | -2.740172 | -1.419581 | -0.097881 |
| C | -3.658462 | -0.844666 | -0.990597 |
| C | -3.232312 | -2.407775 | 0.772160  |
| C | -5.001908 | -1.232154 | -1.017915 |
| H | -3.302541 | -0.066774 | -1.672473 |
| C | -4.572672 | -2.798523 | 0.763929  |
| H | -2.545061 | -2.888103 | 1.477252  |
| C | -5.464701 | -2.211417 | -0.137393 |
| H | -5.692726 | -0.768572 | -1.726743 |
| H | -4.926012 | -3.565234 | 1.457806  |
| H | -6.513479 | -2.516094 | -0.152535 |
| B | -1.175251 | -0.954746 | -0.040619 |
| C | 3.035670  | -0.760130 | -0.864475 |
| C | 4.958521  | -0.300967 | 0.680228  |
| C | 4.537343  | -1.096945 | -0.559345 |
| H | 2.370399  | -1.580913 | -0.571960 |
| H | 2.881612  | -0.504325 | -1.920371 |
| H | 4.623769  | -2.178336 | -0.388194 |
| H | 5.162472  | -0.828664 | -1.421891 |
| C | 2.575813  | 0.088181  | 1.364680  |
| H | 2.390411  | 1.027370  | 1.899195  |
| H | 1.723264  | -0.592006 | 1.496725  |
| C | 3.937079  | -0.559855 | 1.794815  |
| H | 4.255742  | -0.110641 | 2.744557  |
| H | 3.801820  | -1.640060 | 1.947976  |
| H | 5.962560  | -0.607485 | 1.005355  |
| C | 4.949645  | 1.192986  | 0.332439  |
| H | 5.109049  | 1.798745  | 1.234955  |
| H | 5.737959  | 1.435523  | -0.392120 |
| C | 3.556340  | 1.547008  | -0.302614 |
| H | 3.098409  | 2.427437  | 0.163289  |
| H | 3.623987  | 1.692346  | -1.387336 |
| N | 2.720651  | 0.393088  | -0.044395 |
| H | 0.933574  | 0.829652  | -0.568901 |

TS3

M06-2X SCF energy: -1465.88737279 a.u.  
M06-2X enthalpy: -1465.274248 a.u.  
M06-2X free energy: -1465.368530 a.u.  
M06-2X SCF energy in solution: -1467.52981882 a.u.  
M06-2X enthalpy in solution: -1466.916694 a.u.  
M06-2X free energy in solution: -1467.010976 a.u.  
Three lowest frequencies (cm-1): -105.3746 24.0249 28.4533  
Imaginary frequency: -105.3746 cm-1

Cartesian coordinates

| ATOM | X         | Y        | Z         |
|------|-----------|----------|-----------|
| C    | -0.525915 | 3.534632 | -0.267126 |

|   |           |           |           |
|---|-----------|-----------|-----------|
| C | -0.105645 | 1.068505  | -0.349065 |
| C | 0.072295  | 2.398580  | -1.081427 |
| H | -1.600379 | 3.331907  | -0.101490 |
| H | 1.162232  | 2.585763  | -1.149818 |
| O | 0.152615  | 3.563757  | 0.983437  |
| C | -0.112700 | 2.465791  | 1.811690  |
| H | 0.542769  | 2.601318  | 2.690872  |
| O | -1.455888 | 2.434299  | 2.196739  |
| C | -1.879408 | 3.589691  | 2.880230  |
| H | -2.899512 | 3.406686  | 3.240780  |
| H | -1.225728 | 3.799900  | 3.745427  |
| H | -1.884562 | 4.476714  | 2.226233  |
| C | -0.353456 | 4.883276  | -0.928614 |
| H | -0.861143 | 4.888479  | -1.901617 |
| H | -0.780335 | 5.676984  | -0.299663 |
| H | 0.715007  | 5.093483  | -1.086427 |
| O | -0.518130 | 2.358863  | -2.355477 |
| H | -0.132805 | 1.605361  | -2.824564 |
| O | 0.718434  | 0.098410  | -0.860461 |
| C | 0.180048  | 1.114839  | 1.162333  |
| H | -0.478592 | 0.383907  | 1.671662  |
| O | 1.515384  | 0.728745  | 1.253917  |
| B | 1.675691  | -0.345628 | 0.240471  |
| C | -1.916941 | -1.195732 | -1.839723 |
| C | -4.051696 | -2.277693 | -1.092584 |
| C | -2.812636 | -2.470471 | -1.975564 |
| H | -1.957178 | -0.565765 | -2.737197 |
| H | -0.869518 | -1.434573 | -1.605821 |
| H | -3.091580 | -2.598035 | -3.029910 |
| H | -2.250286 | -3.359742 | -1.656994 |
| C | -3.723470 | 0.219312  | -1.043458 |
| H | -4.057784 | 0.764488  | -0.152394 |
| H | -3.564629 | 0.922671  | -1.869947 |
| C | -4.708949 | -0.934261 | -1.435838 |
| H | -5.648875 | -0.805334 | -0.883237 |
| H | -4.929831 | -0.882247 | -2.510758 |
| H | -4.765134 | -3.097183 | -1.255523 |
| C | -3.605703 | -2.250564 | 0.373460  |
| H | -4.452265 | -2.000291 | 1.027467  |
| H | -3.204656 | -3.224937 | 0.683246  |
| C | -2.484235 | -1.167312 | 0.520006  |
| H | -2.697580 | -0.462981 | 1.334289  |
| H | -1.493157 | -1.618471 | 0.667901  |
| N | -2.462783 | -0.432767 | -0.733490 |
| H | -1.202468 | 0.788374  | -0.518350 |
| C | 1.155774  | -1.790961 | 0.811431  |
| C | 0.903971  | -2.866400 | -0.058721 |
| C | 0.874561  | -1.995938 | 2.170568  |
| C | 0.376362  | -4.077190 | 0.395529  |
| H | 1.117839  | -2.750391 | -1.127266 |
| C | 0.345691  | -3.202083 | 2.642579  |

|   |           |           |           |
|---|-----------|-----------|-----------|
| H | 1.057345  | -1.176518 | 2.873038  |
| C | 0.088626  | -4.246868 | 1.753584  |
| H | 0.188674  | -4.892499 | -0.307677 |
| H | 0.129787  | -3.327357 | 3.706476  |
| H | -0.326274 | -5.190042 | 2.115821  |
| C | 3.198126  | -0.394898 | -0.322109 |
| C | 4.219441  | -1.062645 | 0.374586  |
| C | 3.560546  | 0.260899  | -1.509171 |
| C | 5.540902  | -1.064928 | -0.077917 |
| H | 3.974262  | -1.600563 | 1.296534  |
| C | 4.876843  | 0.261102  | -1.979045 |
| H | 2.783372  | 0.779831  | -2.077744 |
| C | 5.874033  | -0.401876 | -1.261400 |
| H | 6.314079  | -1.589553 | 0.488606  |
| H | 5.127232  | 0.779913  | -2.907599 |
| H | 6.904590  | -0.405239 | -1.622931 |

#### TS4

|                                  |                     |         |         |
|----------------------------------|---------------------|---------|---------|
| M06-2X SCF energy:               | -1465.88521627 a.u. |         |         |
| M06-2X enthalpy:                 | -1465.273427 a.u.   |         |         |
| M06-2X free energy:              | -1465.366175 a.u.   |         |         |
| M06-2X SCF energy in solution:   | -1467.52448366 a.u. |         |         |
| M06-2X enthalpy in solution:     | -1466.912694 a.u.   |         |         |
| M06-2X free energy in solution:  | -1467.005442 a.u.   |         |         |
| Three lowest frequencies (cm-1): | -431.2418           | 14.4156 | 25.3717 |
| Imaginary frequency:             | -431.2418 cm-1      |         |         |

#### Cartesian coordinates

| ATOM | X         | Y        | Z         |
|------|-----------|----------|-----------|
| C    | -1.533246 | 3.010106 | 0.578464  |
| C    | 0.427182  | 1.517231 | 1.042746  |
| C    | -1.073030 | 1.720366 | 1.236672  |
| H    | 0.907661  | 2.240471 | 1.733794  |
| H    | -1.633921 | 0.894282 | 0.605515  |
| O    | -1.320505 | 2.823265 | -0.816948 |
| C    | 0.035583  | 2.790240 | -1.189627 |
| H    | 0.031796  | 2.514112 | -2.259443 |
| O    | 0.630530  | 4.036475 | -1.001141 |
| C    | 0.047552  | 5.067979 | -1.761843 |
| H    | 0.056925  | 4.819950 | -2.838189 |
| H    | -0.993689 | 5.262701 | -1.458899 |
| H    | 0.642214  | 5.975613 | -1.600058 |
| C    | -2.985248 | 3.352658 | 0.811810  |
| H    | -3.180500 | 3.449761 | 1.887756  |
| H    | -3.229804 | 4.304709 | 0.321001  |
| H    | -3.638060 | 2.570970 | 0.400651  |
| O    | -1.466520 | 1.581704 | 2.547925  |
| H    | -0.918140 | 0.882450 | 2.942700  |
| O    | 0.803722  | 0.204551 | 1.330033  |

|   |           |           |           |
|---|-----------|-----------|-----------|
| C | 0.877964  | 1.774018  | -0.413941 |
| H | 1.903193  | 2.188866  | -0.393334 |
| O | 0.877384  | 0.501921  | -0.988018 |
| C | 3.079125  | -0.172370 | 0.181493  |
| C | 3.894062  | -0.322364 | -0.954424 |
| C | 3.727168  | 0.118654  | 1.391738  |
| C | 5.281928  | -0.186919 | -0.891464 |
| H | 3.426305  | -0.549249 | -1.918715 |
| C | 5.117406  | 0.251653  | 1.473078  |
| H | 3.117747  | 0.249844  | 2.291239  |
| C | 5.901133  | 0.099239  | 0.328837  |
| H | 5.886527  | -0.305248 | -1.794205 |
| H | 5.592542  | 0.477554  | 2.431120  |
| H | 6.986883  | 0.203621  | 0.384582  |
| C | 1.108650  | -1.930289 | -0.146796 |
| C | 0.807695  | -2.448065 | -1.416792 |
| C | 1.189856  | -2.852294 | 0.911984  |
| C | 0.594083  | -3.815332 | -1.625777 |
| H | 0.736137  | -1.759181 | -2.264484 |
| C | 0.974072  | -4.218307 | 0.719976  |
| H | 1.426688  | -2.489267 | 1.917757  |
| C | 0.677184  | -4.706936 | -0.555611 |
| H | 0.362376  | -4.185342 | -2.627679 |
| H | 1.040371  | -4.908111 | 1.564749  |
| H | 0.511422  | -5.774847 | -0.712505 |
| B | 1.446942  | -0.359433 | 0.085269  |
| C | -2.165974 | -0.595312 | -1.197571 |
| C | -3.629632 | -2.484237 | -0.436931 |
| C | -2.961135 | -1.851802 | -1.663629 |
| H | -2.425324 | 0.300732  | -1.775311 |
| H | -1.079233 | -0.732828 | -1.228715 |
| H | -3.717866 | -1.564990 | -2.407150 |
| H | -2.266821 | -2.563026 | -2.133540 |
| C | -3.973829 | -0.114171 | 0.343343  |
| H | -4.162400 | 0.295375  | 1.344266  |
| H | -4.284033 | 0.609703  | -0.419316 |
| C | -4.662624 | -1.501217 | 0.133059  |
| H | -5.053302 | -1.874746 | 1.089843  |
| H | -5.507431 | -1.376636 | -0.557049 |
| H | -4.120395 | -3.426941 | -0.714330 |
| C | -2.547582 | -2.734133 | 0.621180  |
| H | -2.939796 | -3.318946 | 1.464107  |
| H | -1.704525 | -3.287056 | 0.178960  |
| C | -2.054631 | -1.354900 | 1.137289  |
| H | -2.480125 | -1.108294 | 2.118970  |
| H | -0.961852 | -1.283891 | 1.186783  |
| N | -2.541738 | -0.347858 | 0.193165  |
| H | -0.893257 | 3.835752  | 0.942243  |



TS5

M06-2X SCF energy: -1465.88109266 a.u.  
M06-2X enthalpy: -1465.269469 a.u.  
M06-2X free energy: -1465.363461 a.u.  
M06-2X SCF energy in solution: -1467.52269379 a.u.  
M06-2X enthalpy in solution: -1466.911070 a.u.  
M06-2X free energy in solution: -1467.005062 a.u.  
Three lowest frequencies (cm-1): -524.7712 12.5855 28.0917  
Imaginary frequency: -524.7712 cm-1

Cartesian coordinates

| ATOM | X         | Y         | Z         |
|------|-----------|-----------|-----------|
| C    | -1.503816 | 1.236003  | 0.886900  |
| C    | 0.113017  | -0.169241 | -0.457667 |
| C    | -0.413797 | 1.233742  | -0.173289 |
| H    | -0.636355 | -0.716016 | -1.055871 |
| H    | 0.421135  | 1.822883  | 0.255774  |
| O    | -1.081091 | 0.627233  | 2.057617  |
| C    | -0.578729 | -0.693463 | 1.956896  |
| H    | -0.107620 | -0.884464 | 2.935077  |
| O    | -1.625787 | -1.584040 | 1.732220  |
| C    | -2.386025 | -1.861889 | 2.890942  |
| H    | -2.860707 | -0.952162 | 3.292152  |
| H    | -3.163354 | -2.585993 | 2.616555  |
| H    | -1.748894 | -2.305390 | 3.674642  |
| C    | -2.073104 | 2.595527  | 1.202644  |
| H    | -2.407839 | 3.092996  | 0.284323  |
| H    | -2.912501 | 2.512043  | 1.907601  |
| H    | -1.287848 | 3.211688  | 1.668333  |
| O    | -0.902634 | 1.839579  | -1.344981 |
| H    | -0.254963 | 1.651020  | -2.041360 |
| O    | 1.332068  | -0.084793 | -1.132477 |
| C    | 0.453900  | -0.880984 | 0.852907  |
| H    | 0.520355  | -1.973591 | 0.674760  |
| O    | 1.688962  | -0.333384 | 1.191061  |
| C    | 3.416059  | -1.397330 | -0.411694 |
| C    | 3.634141  | -2.416906 | 0.527467  |
| C    | 4.087401  | -1.515503 | -1.641926 |
| C    | 4.473129  | -3.504239 | 0.259451  |
| H    | 3.124467  | -2.351037 | 1.493767  |
| C    | 4.926049  | -2.594351 | -1.926404 |
| H    | 3.949004  | -0.738554 | -2.402011 |
| C    | 5.122768  | -3.597162 | -0.971670 |
| H    | 4.620353  | -4.282099 | 1.013042  |
| H    | 5.431698  | -2.658028 | -2.893256 |
| H    | 5.778916  | -4.442951 | -1.188525 |
| C    | 3.267377  | 1.267758  | -0.037563 |
| C    | 4.363573  | 1.415654  | 0.830691  |
| C    | 2.935326  | 2.378383  | -0.828854 |
| C    | 5.080646  | 2.609796  | 0.921828  |
| H    | 4.666474  | 0.568311  | 1.455656  |

|   |           |           |           |
|---|-----------|-----------|-----------|
| C | 3.649030  | 3.579575  | -0.757169 |
| H | 2.088000  | 2.296960  | -1.516788 |
| C | 4.725085  | 3.700330  | 0.122721  |
| H | 5.922362  | 2.693003  | 1.613740  |
| H | 3.365398  | 4.424944  | -1.389128 |
| H | 5.285688  | 4.635623  | 0.184621  |
| B | 2.425206  | -0.131161 | -0.097614 |
| C | -4.194921 | 1.243314  | -1.109714 |
| C | -5.838265 | -0.630533 | -1.356159 |
| C | -5.390738 | 0.709606  | -1.952222 |
| H | -4.503206 | 2.048257  | -0.430873 |
| H | -3.354732 | 1.586349  | -1.726152 |
| H | -6.205069 | 1.445599  | -1.923971 |
| H | -5.085027 | 0.577041  | -2.999528 |
| C | -4.645882 | -0.193018 | 0.802804  |
| H | -4.263854 | -1.085050 | 1.310838  |
| H | -4.664585 | 0.651953  | 1.503661  |
| C | -6.038366 | -0.450858 | 0.154109  |
| H | -6.480100 | -1.349815 | 0.604196  |
| H | -6.710812 | 0.395693  | 0.350916  |
| H | -6.772453 | -0.965966 | -1.826208 |
| C | -4.726511 | -1.663185 | -1.583848 |
| H | -4.947542 | -2.587474 | -1.032102 |
| H | -4.633266 | -1.914167 | -2.648751 |
| C | -3.382250 | -1.052401 | -1.088152 |
| H | -2.812768 | -1.741090 | -0.450364 |
| H | -2.753894 | -0.712653 | -1.920982 |
| N | -3.725761 | 0.124290  | -0.288133 |
| H | -2.394885 | 0.609409  | 0.405524  |

6

|                                  |                     |         |         |
|----------------------------------|---------------------|---------|---------|
| M06-2X SCF energy:               | -1136.50487309 a.u. |         |         |
| M06-2X enthalpy:                 | -1136.106767 a.u.   |         |         |
| M06-2X free energy:              | -1136.183614 a.u.   |         |         |
| M06-2X SCF energy in solution:   | -1137.78567128 a.u. |         |         |
| M06-2X enthalpy in solution:     | -1137.387565 a.u.   |         |         |
| M06-2X free energy in solution:  | -1137.464412 a.u.   |         |         |
| Three lowest frequencies (cm-1): | 19.2413             | 23.8264 | 31.9268 |

Cartesian coordinates

| ATOM | X         | Y        | Z         |
|------|-----------|----------|-----------|
| C    | -1.743956 | 3.290064 | 0.541177  |
| C    | -0.645632 | 1.067883 | 0.940799  |
| C    | -1.896799 | 1.918275 | 1.194553  |
| H    | -0.835076 | 3.772647 | 0.948646  |
| H    | 0.150766  | 1.472994 | 1.597682  |
| H    | -2.747945 | 1.412879 | 0.695249  |
| O    | -1.598473 | 3.113852 | -0.863278 |
| C    | -0.417541 | 2.422257 | -1.240540 |

|   |           |           |           |
|---|-----------|-----------|-----------|
| H | -0.522208 | 2.257486  | -2.328272 |
| O | 0.710544  | 3.202692  | -0.965572 |
| C | 0.696493  | 4.459551  | -1.595967 |
| H | -0.068199 | 5.129339  | -1.169566 |
| H | 1.685705  | 4.914263  | -1.454264 |
| H | 0.502800  | 4.361103  | -2.679646 |
| C | -2.942833 | 4.183154  | 0.772095  |
| H | -3.092559 | 4.341181  | 1.847857  |
| H | -2.796832 | 5.157690  | 0.284761  |
| H | -3.847323 | 3.714628  | 0.355193  |
| O | -2.138504 | 2.078337  | 2.570906  |
| H | -2.115070 | 1.191120  | 2.957678  |
| O | -0.877856 | -0.282799 | 1.214655  |
| C | -0.286496 | 1.117882  | -0.521605 |
| O | -0.732569 | 0.007677  | -1.124140 |
| C | -0.112283 | -2.307016 | -0.158270 |
| C | -0.231090 | -3.268541 | -1.177504 |
| C | 0.937919  | -2.480343 | 0.756188  |
| C | 0.654777  | -4.342477 | -1.287065 |
| H | -1.043167 | -3.175872 | -1.907079 |
| C | 1.829159  | -3.553783 | 0.665029  |
| H | 1.048503  | -1.748607 | 1.561078  |
| C | 1.690759  | -4.490092 | -0.360597 |
| H | 0.537371  | -5.071683 | -2.092375 |
| H | 2.633657  | -3.662711 | 1.396657  |
| H | 2.383566  | -5.330864 | -0.437555 |
| C | -2.679700 | -1.418459 | -0.268895 |
| C | -3.541266 | -0.671936 | -1.089543 |
| C | -3.248949 | -2.503384 | 0.420611  |
| C | -4.899201 | -0.981063 | -1.213859 |
| H | -3.131691 | 0.180719  | -1.639579 |
| C | -4.604064 | -2.823357 | 0.310965  |
| H | -2.611413 | -3.120816 | 1.063090  |
| C | -5.437194 | -2.060336 | -0.511088 |
| H | -5.540860 | -0.378078 | -1.861334 |
| H | -5.014523 | -3.671776 | 0.864213  |
| H | -6.497138 | -2.306849 | -0.603619 |
| B | -1.106188 | -1.014222 | -0.064633 |

TS6

|                                  |                     |         |         |
|----------------------------------|---------------------|---------|---------|
| M06-2X SCF energy:               | -1442.62305399 a.u. |         |         |
| M06-2X enthalpy:                 | -1442.121057 a.u.   |         |         |
| M06-2X free energy:              | -1442.215051 a.u.   |         |         |
| M06-2X SCF energy in solution:   | -1444.25757556 a.u. |         |         |
| M06-2X enthalpy in solution:     | -1443.755579 a.u.   |         |         |
| M06-2X free energy in solution:  | -1443.849573 a.u.   |         |         |
| Three lowest frequencies (cm-1): | -131.4653           | 18.5330 | 23.0396 |
| Imaginary frequency:             | -131.4653 cm-1      |         |         |

## Cartesian coordinates

| ATOM | X         | Y         | Z         |
|------|-----------|-----------|-----------|
| C    | -0.924724 | -3.052807 | 0.536328  |
| C    | -0.082721 | -0.788466 | 1.259333  |
| C    | 0.255956  | -2.282313 | 1.122302  |
| H    | -1.795065 | -2.921424 | 1.205537  |
| H    | -0.797715 | -0.677453 | 2.096917  |
| H    | 1.086222  | -2.364558 | 0.393156  |
| O    | -1.229793 | -2.522235 | -0.750677 |
| C    | -1.662008 | -1.169564 | -0.724930 |
| H    | -1.791863 | -0.886339 | -1.784246 |
| O    | -2.858825 | -1.064115 | -0.022290 |
| C    | -3.943326 | -1.709966 | -0.642461 |
| H    | -3.783941 | -2.798594 | -0.714281 |
| H    | -4.833273 | -1.516363 | -0.029489 |
| H    | -4.109166 | -1.307951 | -1.657842 |
| C    | -0.628079 | -4.526740 | 0.368732  |
| H    | 0.224106  | -4.664654 | -0.313981 |
| H    | -0.376189 | -4.969518 | 1.341008  |
| H    | -1.500222 | -5.050319 | -0.047614 |
| O    | 0.615628  | -2.840333 | 2.361252  |
| H    | 1.311116  | -2.273080 | 2.722852  |
| O    | 1.068392  | -0.023244 | 1.465173  |
| C    | -0.628954 | -0.308149 | -0.057727 |
| O    | 0.377577  | 0.162905  | -0.789884 |
| C    | 1.932560  | 2.010807  | 0.174778  |
| C    | 1.950030  | 2.727275  | 1.381264  |
| C    | 2.250568  | 2.722454  | -0.994931 |
| C    | 2.266321  | 4.088697  | 1.425958  |
| H    | 1.697658  | 2.197355  | 2.304083  |
| C    | 2.557116  | 4.084377  | -0.967633 |
| H    | 2.257020  | 2.197249  | -1.956155 |
| C    | 2.567942  | 4.773801  | 0.248038  |
| H    | 2.273325  | 4.619780  | 2.381068  |
| H    | 2.790748  | 4.613262  | -1.894894 |
| H    | 2.810479  | 5.838392  | 0.275014  |
| C    | 2.834227  | -0.455855 | -0.388675 |
| C    | 2.910336  | -0.987224 | -1.685787 |
| C    | 3.920713  | -0.706467 | 0.467308  |
| C    | 4.014568  | -1.732019 | -2.112967 |
| H    | 2.074036  | -0.825761 | -2.372269 |
| C    | 5.027071  | -1.452051 | 0.056619  |
| H    | 3.895667  | -0.311318 | 1.488427  |
| C    | 5.078680  | -1.968067 | -1.241262 |
| H    | 4.043814  | -2.134172 | -3.128721 |
| H    | 5.853120  | -1.634125 | 0.748505  |
| H    | 5.941669  | -2.552533 | -1.567660 |
| B    | 1.564243  | 0.424384  | 0.135924  |
| C    | -1.670060 | 1.859571  | 0.383174  |
| C    | -2.962454 | 1.765048  | 0.765915  |
| H    | -0.866362 | 2.022902  | 1.104963  |

|   |           |          |           |
|---|-----------|----------|-----------|
| H | -3.265706 | 1.717466 | 1.813110  |
| C | -3.998111 | 1.547831 | -0.249234 |
| O | -3.832237 | 1.552877 | -1.450011 |
| O | -5.206759 | 1.334415 | 0.302310  |
| C | -6.282844 | 1.143947 | -0.601454 |
| H | -7.174800 | 0.965062 | 0.009009  |
| H | -6.431963 | 2.035906 | -1.226988 |
| H | -6.100315 | 0.281898 | -1.258228 |
| H | -1.422339 | 1.970093 | -0.673994 |

8

|                                  |                     |         |         |
|----------------------------------|---------------------|---------|---------|
| M06-2X SCF energy:               | -1442.66324470 a.u. |         |         |
| M06-2X enthalpy:                 | -1442.158709 a.u.   |         |         |
| M06-2X free energy:              | -1442.251150 a.u.   |         |         |
| M06-2X SCF energy in solution:   | -1444.29294412 a.u. |         |         |
| M06-2X enthalpy in solution:     | -1443.788408 a.u.   |         |         |
| M06-2X free energy in solution:  | -1443.880849 a.u.   |         |         |
| Three lowest frequencies (cm-1): | 23.4511             | 30.2308 | 34.3962 |

Cartesian coordinates

| ATOM | X         | Y         | Z         |
|------|-----------|-----------|-----------|
| C    | 3.273990  | 0.498962  | 0.485097  |
| C    | 0.988795  | -0.553775 | 0.654820  |
| C    | 1.923779  | 0.540516  | 1.175783  |
| H    | 3.740101  | -0.490340 | 0.646652  |
| H    | 1.269789  | -1.499888 | 1.149135  |
| H    | 1.480585  | 1.519979  | 0.925252  |
| O    | 3.031863  | 0.690867  | -0.905368 |
| C    | 2.376923  | -0.382924 | -1.517732 |
| H    | 2.207557  | -0.062624 | -2.562711 |
| O    | 3.171550  | -1.530602 | -1.486161 |
| C    | 4.396616  | -1.389234 | -2.162894 |
| H    | 5.034830  | -0.620789 | -1.698000 |
| H    | 4.913939  | -2.356091 | -2.119852 |
| H    | 4.235224  | -1.115580 | -3.220981 |
| C    | 4.209628  | 1.590391  | 0.953958  |
| H    | 3.757857  | 2.577900  | 0.773287  |
| H    | 4.396686  | 1.481962  | 2.030227  |
| H    | 5.167920  | 1.537933  | 0.417894  |
| O    | 2.092252  | 0.417126  | 2.570518  |
| H    | 1.202270  | 0.391750  | 2.948827  |
| O    | -0.341817 | -0.230318 | 0.951566  |
| C    | 1.004766  | -0.692914 | -0.884355 |
| O    | 0.084507  | 0.268016  | -1.308929 |
| C    | -2.400724 | 0.236581  | -0.494233 |
| C    | -3.020616 | 0.646176  | -1.687325 |
| C    | -3.195191 | -0.465530 | 0.425044  |
| C    | -4.360329 | 0.361126  | -1.960296 |
| H    | -2.436564 | 1.203026  | -2.428235 |

|   |           |           |           |
|---|-----------|-----------|-----------|
| C | -4.540266 | -0.750226 | 0.171112  |
| H | -2.731979 | -0.821926 | 1.349736  |
| C | -5.129081 | -0.339024 | -1.026154 |
| H | -4.810328 | 0.687456  | -2.901449 |
| H | -5.130722 | -1.304666 | 0.905408  |
| H | -6.178390 | -0.562396 | -1.231741 |
| C | -0.762523 | 2.217229  | 0.131791  |
| C | -0.195267 | 3.125942  | -0.775784 |
| C | -1.281512 | 2.752913  | 1.323589  |
| C | -0.141675 | 4.498388  | -0.512389 |
| H | 0.232483  | 2.734223  | -1.703507 |
| C | -1.228333 | 4.119492  | 1.605633  |
| H | -1.733898 | 2.076491  | 2.057448  |
| C | -0.657365 | 5.001512  | 0.683331  |
| H | 0.307561  | 5.180195  | -1.239258 |
| H | -1.632002 | 4.503104  | 2.546263  |
| H | -0.614851 | 6.071814  | 0.896699  |
| B | -0.841999 | 0.605164  | -0.181498 |
| C | 0.567907  | -2.119825 | -1.329269 |
| C | -0.774228 | -2.517873 | -0.849335 |
| H | 0.583090  | -2.122366 | -2.431271 |
| H | -1.677164 | -2.250052 | -1.395464 |
| C | -0.927143 | -3.250080 | 0.392122  |
| O | -0.015891 | -3.606415 | 1.116130  |
| O | -2.213630 | -3.525999 | 0.672852  |
| C | -2.456925 | -4.183798 | 1.903583  |
| H | -2.122190 | -3.567556 | 2.750997  |
| H | -3.539487 | -4.341052 | 1.964079  |
| H | -1.935938 | -5.150964 | 1.945572  |
| H | 1.316771  | -2.834728 | -0.965754 |

Ir(II)

M06-2X SCF energy: -2939.60353188 a.u.  
M06-2X enthalpy: -2938.866849 a.u.  
M06-2X free energy: -2939.007519 a.u.  
M06-2X SCF energy in solution: -2942.83258975 a.u.  
M06-2X enthalpy in solution: -2942.095907 a.u.  
M06-2X free energy in solution: -2942.236577 a.u.  
Three lowest frequencies (cm<sup>-1</sup>): 12.2038 14.2031 18.3202

Cartesian coordinates

| ATOM | X         | Y         | Z        |
|------|-----------|-----------|----------|
| Ir   | 2.030134  | 2.097225  | 0.435870 |
| C    | 0.232309  | -0.354577 | 0.500216 |
| C    | -0.158271 | -1.727052 | 0.466800 |
| C    | 0.769003  | -2.744600 | 0.373253 |
| C    | 2.144869  | -2.378207 | 0.321282 |
| C    | 2.476344  | -1.034980 | 0.371083 |
| H    | -1.220019 | -1.971053 | 0.509996 |

|   |           |           |           |
|---|-----------|-----------|-----------|
| H | 2.940691  | -3.115438 | 0.244391  |
| H | 3.525663  | -0.724298 | 0.338636  |
| C | -0.685261 | 0.737921  | 0.571108  |
| C | -2.103923 | 0.588284  | 0.626806  |
| C | -2.947481 | 1.677933  | 0.698030  |
| H | -2.524414 | -0.417447 | 0.607413  |
| C | -0.970948 | 3.067793  | 0.650358  |
| C | -2.350010 | 2.971803  | 0.717718  |
| H | -0.485366 | 4.049096  | 0.652325  |
| H | -2.940113 | 3.883575  | 0.775544  |
| N | -0.151017 | 2.015134  | 0.571326  |
| N | 1.581143  | -0.046660 | 0.461213  |
| C | 1.025685  | 1.977728  | -2.407089 |
| C | 3.349471  | 1.796744  | -2.163049 |
| C | 1.119904  | 1.859164  | -3.788118 |
| H | 0.063164  | 2.109069  | -1.905797 |
| C | 3.497505  | 1.678361  | -3.551552 |
| C | 2.376353  | 1.708177  | -4.368767 |
| H | 4.484880  | 1.565514  | -3.988369 |
| H | 2.482495  | 1.617996  | -5.450628 |
| C | 4.004582  | 1.946148  | 0.192743  |
| C | 4.421723  | 1.788818  | -1.159316 |
| C | 4.979796  | 1.949287  | 1.199030  |
| C | 5.785735  | 1.631728  | -1.437912 |
| C | 6.316910  | 1.791188  | 0.860698  |
| H | 4.723651  | 2.068952  | 2.254069  |
| C | 6.754919  | 1.628309  | -0.448970 |
| H | 7.808983  | 1.503661  | -0.693479 |
| N | 2.107033  | 1.946102  | -1.627614 |
| C | 1.982883  | 1.347403  | 3.359825  |
| C | 2.186126  | 3.641944  | 2.920528  |
| C | 2.003154  | 1.566221  | 4.728678  |
| H | 1.896275  | 0.344893  | 2.935614  |
| C | 2.212167  | 3.916053  | 4.297471  |
| C | 2.120794  | 2.873461  | 5.204263  |
| H | 2.304535  | 4.938566  | 4.650850  |
| H | 2.141113  | 3.075139  | 6.277418  |
| C | 2.233157  | 4.077705  | 0.513466  |
| C | 2.274258  | 4.619892  | 1.828859  |
| C | 2.313233  | 4.952513  | -0.578066 |
| C | 2.383385  | 6.007640  | 1.988554  |
| C | 2.420741  | 6.318256  | -0.355965 |
| H | 2.290548  | 4.593370  | -1.609215 |
| C | 2.457329  | 6.880065  | 0.915516  |
| H | 2.539331  | 7.955258  | 1.069481  |
| N | 2.073680  | 2.357999  | 2.490504  |
| C | -4.466510 | 1.476106  | 0.732616  |
| C | 0.305226  | -4.205050 | 0.327818  |
| C | -4.842381 | 0.570289  | 1.915430  |
| H | -5.933737 | 0.427177  | 1.947336  |
| H | -4.375006 | -0.421600 | 1.830327  |

|   |           |           |           |
|---|-----------|-----------|-----------|
| H | -4.526798 | 1.018007  | 2.870337  |
| C | -4.913085 | 0.809870  | -0.578279 |
| H | -6.005146 | 0.666723  | -0.578170 |
| H | -4.649132 | 1.434668  | -1.445601 |
| H | -4.441372 | -0.175219 | -0.709534 |
| C | -5.212091 | 2.804748  | 0.880680  |
| H | -4.932362 | 3.327751  | 1.807620  |
| H | -5.013786 | 3.477459  | 0.033109  |
| H | -6.295449 | 2.615800  | 0.912568  |
| C | -0.452276 | -4.536888 | 1.623021  |
| H | -1.337862 | -3.895820 | 1.743408  |
| H | -0.790305 | -5.585009 | 1.605830  |
| H | 0.194433  | -4.398858 | 2.503157  |
| C | -0.632844 | -4.405154 | -0.872165 |
| H | -0.119698 | -4.164528 | -1.815977 |
| H | -0.966072 | -5.453759 | -0.920107 |
| H | -1.527745 | -3.769935 | -0.797372 |
| C | 1.483915  | -5.172153 | 0.188580  |
| H | 2.051685  | -4.987948 | -0.735878 |
| H | 2.177541  | -5.096393 | 1.039417  |
| H | 1.108457  | -6.205794 | 0.152396  |
| C | 1.887882  | 0.423842  | 5.695946  |
| F | 1.876836  | -0.757814 | 5.081267  |
| F | 0.767984  | 0.507446  | 6.421096  |
| F | 2.903986  | 0.415446  | 6.563964  |
| F | 2.415207  | 6.545585  | 3.212502  |
| F | 2.492000  | 7.140456  | -1.405898 |
| F | 7.233002  | 1.793665  | 1.832071  |
| F | 6.201972  | 1.472333  | -2.699339 |
| C | -0.138953 | 1.865814  | -4.607924 |
| F | -0.825332 | 0.727090  | -4.468901 |
| F | 0.119599  | 2.014714  | -5.906563 |
| F | -0.959897 | 2.854083  | -4.242489 |

Ir(III)

|                                  |                     |         |         |
|----------------------------------|---------------------|---------|---------|
| M06-2X SCF energy:               | -2939.50745014 a.u. |         |         |
| M06-2X enthalpy:                 | -2938.767479 a.u.   |         |         |
| M06-2X free energy:              | -2938.907974 a.u.   |         |         |
| M06-2X SCF energy in solution:   | -2942.73480865 a.u. |         |         |
| M06-2X enthalpy in solution:     | -2941.994838 a.u.   |         |         |
| M06-2X free energy in solution:  | -2942.135333 a.u.   |         |         |
| Three lowest frequencies (cm-1): | 7.8545              | 12.9172 | 16.3036 |

Cartesian coordinates

| ATOM | X         | Y         | Z        |
|------|-----------|-----------|----------|
| Ir   | 2.033061  | 2.096327  | 0.390862 |
| C    | 0.222929  | -0.390026 | 0.457884 |
| C    | -0.196398 | -1.714768 | 0.387654 |
| C    | 0.736191  | -2.753409 | 0.253557 |



|   |           |           |           |
|---|-----------|-----------|-----------|
| C | 2.084252  | -2.389899 | 0.206646  |
| C | 2.435574  | -1.045684 | 0.287373  |
| H | -1.260022 | -1.946460 | 0.424067  |
| H | 2.877164  | -3.128566 | 0.102986  |
| H | 3.483794  | -0.738042 | 0.250564  |
| C | -0.728180 | 0.752596  | 0.576690  |
| C | -2.099119 | 0.578347  | 0.741278  |
| C | -2.953314 | 1.686628  | 0.835054  |
| H | -2.509468 | -0.428845 | 0.803648  |
| C | -0.982450 | 3.052489  | 0.596879  |
| C | -2.360890 | 2.949484  | 0.757091  |
| H | -0.496131 | 4.029439  | 0.535021  |
| H | -2.946609 | 3.865061  | 0.817255  |
| N | -0.187108 | 1.986368  | 0.508963  |
| N | 1.532957  | -0.072153 | 0.408520  |
| C | 1.149359  | 1.933744  | -2.494535 |
| C | 3.459598  | 1.750891  | -2.145609 |
| C | 1.304006  | 1.796191  | -3.867803 |
| H | 0.164110  | 2.074293  | -2.043166 |
| C | 3.668667  | 1.609465  | -3.523760 |
| C | 2.584244  | 1.630620  | -4.389534 |
| H | 4.673686  | 1.487427  | -3.915827 |
| H | 2.737290  | 1.524337  | -5.464309 |
| C | 4.007850  | 1.946444  | 0.232763  |
| C | 4.484309  | 1.761818  | -1.094461 |
| C | 4.928878  | 1.965325  | 1.286202  |
| C | 5.859610  | 1.595989  | -1.303651 |
| C | 6.280447  | 1.795856  | 1.014661  |
| H | 4.622933  | 2.105248  | 2.324709  |
| C | 6.779591  | 1.607754  | -0.268892 |
| H | 7.843756  | 1.475749  | -0.460670 |
| N | 2.194882  | 1.907990  | -1.667335 |
| C | 1.891002  | 1.411085  | 3.335891  |
| C | 2.114954  | 3.692376  | 2.849626  |
| C | 1.866597  | 1.662611  | 4.702187  |
| H | 1.822524  | 0.393961  | 2.941946  |
| C | 2.097806  | 3.998310  | 4.216698  |
| C | 1.971037  | 2.977472  | 5.148054  |
| H | 2.186214  | 5.028137  | 4.549304  |
| H | 1.959527  | 3.204862  | 6.214733  |
| C | 2.252917  | 4.070921  | 0.436168  |
| C | 2.249457  | 4.641700  | 1.738061  |
| C | 2.374417  | 4.913277  | -0.674646 |
| C | 2.364592  | 6.032079  | 1.866635  |
| C | 2.484152  | 6.284163  | -0.482390 |
| H | 2.384008  | 4.530151  | -1.696710 |
| C | 2.482824  | 6.876099  | 0.775030  |
| H | 2.569688  | 7.954130  | 0.904980  |
| N | 2.007387  | 2.396852  | 2.445394  |
| C | -4.454484 | 1.476986  | 1.012648  |
| C | 0.252639  | -4.197990 | 0.158238  |

|   |           |           |           |
|---|-----------|-----------|-----------|
| C | -4.695860 | 0.683969  | 2.306927  |
| H | -5.776464 | 0.533919  | 2.451477  |
| H | -4.219775 | -0.306721 | 2.270713  |
| H | -4.303278 | 1.226454  | 3.180227  |
| C | -4.985988 | 0.678232  | -0.187505 |
| H | -6.068205 | 0.514980  | -0.072555 |
| H | -4.817665 | 1.223330  | -1.128549 |
| H | -4.501728 | -0.306140 | -0.267326 |
| C | -5.205680 | 2.806511  | 1.096127  |
| H | -4.873748 | 3.408772  | 1.955214  |
| H | -5.075371 | 3.403188  | 0.181094  |
| H | -6.280210 | 2.608062  | 1.219469  |
| C | -0.517377 | -4.548158 | 1.441569  |
| H | -1.390228 | -3.893681 | 1.580387  |
| H | -0.877541 | -5.586473 | 1.384398  |
| H | 0.129710  | -4.455815 | 2.326902  |
| C | -0.683065 | -4.327901 | -1.054156 |
| H | -0.158953 | -4.065466 | -1.985541 |
| H | -1.035610 | -5.366934 | -1.137633 |
| H | -1.566095 | -3.678837 | -0.959767 |
| C | 1.418085  | -5.174917 | -0.006664 |
| H | 1.992792  | -4.969026 | -0.922081 |
| H | 2.105966  | -5.136711 | 0.851306  |
| H | 1.025501  | -6.199635 | -0.078401 |
| C | 1.705149  | 0.511444  | 5.655220  |
| F | 2.515494  | -0.502930 | 5.340796  |
| F | 0.459988  | 0.025269  | 5.639290  |
| F | 1.973304  | 0.870242  | 6.909151  |
| F | 2.360021  | 6.598103  | 3.076458  |
| F | 2.596338  | 7.077509  | -1.548772 |
| F | 7.146788  | 1.812446  | 2.028993  |
| F | 6.332361  | 1.413661  | -2.540213 |
| C | 0.083422  | 1.797731  | -4.744649 |
| F | -0.601992 | 0.655112  | -4.637126 |
| F | 0.401020  | 1.948881  | -6.029072 |
| F | -0.757014 | 2.781520  | -4.415023 |

9

|                                  |                     |         |         |
|----------------------------------|---------------------|---------|---------|
| M06-2X SCF energy:               | -1443.31500078 a.u. |         |         |
| M06-2X enthalpy:                 | -1442.796938 a.u.   |         |         |
| M06-2X free energy:              | -1442.886358 a.u.   |         |         |
| M06-2X SCF energy in solution:   | -1444.94591025 a.u. |         |         |
| M06-2X enthalpy in solution:     | -1444.427847 a.u.   |         |         |
| M06-2X free energy in solution:  | -1444.517267 a.u.   |         |         |
| Three lowest frequencies (cm-1): | 30.1719             | 40.0180 | 40.8272 |

Cartesian coordinates

| ATOM | X        | Y        | Z        |
|------|----------|----------|----------|
| C    | 3.228084 | 0.475628 | 0.500967 |

|   |           |           |           |
|---|-----------|-----------|-----------|
| C | 0.990466  | -0.672313 | 0.611791  |
| C | 1.874247  | 0.439219  | 1.182106  |
| H | 3.729627  | -0.502366 | 0.622444  |
| H | 1.309828  | -1.614320 | 1.086460  |
| H | 1.401272  | 1.411813  | 0.968262  |
| O | 2.980447  | 0.717788  | -0.879905 |
| C | 2.379720  | -0.359076 | -1.540965 |
| H | 2.194094  | 0.001430  | -2.570186 |
| O | 3.239529  | -1.460405 | -1.567051 |
| C | 4.472035  | -1.202175 | -2.192835 |
| H | 5.103966  | -0.525254 | -1.594732 |
| H | 4.991795  | -2.161938 | -2.310276 |
| H | 4.326629  | -0.749638 | -3.190275 |
| C | 4.121835  | 1.580015  | 1.018454  |
| H | 3.634016  | 2.556645  | 0.876806  |
| H | 4.312359  | 1.434483  | 2.089744  |
| H | 5.081276  | 1.586069  | 0.481837  |
| O | 2.034877  | 0.267264  | 2.573828  |
| H | 1.142694  | 0.184743  | 2.938390  |
| O | -0.360699 | -0.418607 | 0.904150  |
| C | 1.023432  | -0.780049 | -0.933258 |
| O | 0.045820  | 0.143304  | -1.341595 |
| C | -2.432434 | 0.154141  | -0.514943 |
| C | -2.984719 | 0.443346  | -1.774113 |
| C | -3.310163 | -0.336558 | 0.465201  |
| C | -4.340673 | 0.250803  | -2.050091 |
| H | -2.328949 | 0.822485  | -2.565020 |
| C | -4.670459 | -0.527792 | 0.207219  |
| H | -2.908111 | -0.595467 | 1.449113  |
| C | -5.192636 | -0.234513 | -1.054573 |
| H | -4.737221 | 0.479455  | -3.042699 |
| H | -5.328477 | -0.914073 | 0.990229  |
| H | -6.254410 | -0.385417 | -1.261767 |
| C | -0.771645 | 2.062714  | 0.172513  |
| C | -0.280706 | 3.009461  | -0.740383 |
| C | -1.222440 | 2.552508  | 1.411012  |
| C | -0.232174 | 4.373889  | -0.437393 |
| H | 0.092605  | 2.655440  | -1.706228 |
| C | -1.174145 | 3.910554  | 1.732266  |
| H | -1.613481 | 1.845316  | 2.150962  |
| C | -0.677780 | 4.831006  | 0.804384  |
| H | 0.159892  | 5.085052  | -1.169283 |
| H | -1.523919 | 4.257338  | 2.708124  |
| H | -0.638927 | 5.894935  | 1.048311  |
| B | -0.861078 | 0.459595  | -0.196857 |
| C | 0.684045  | -2.196545 | -1.438440 |
| C | -0.707700 | -2.701186 | -1.087963 |
| H | 0.774603  | -2.175668 | -2.536626 |
| H | -0.954601 | -3.575356 | -1.715061 |
| C | -0.855987 | -3.177221 | 0.333288  |
| O | 0.034916  | -3.580738 | 1.040385  |

|   |           |           |           |
|---|-----------|-----------|-----------|
| O | -2.134542 | -3.190326 | 0.716511  |
| C | -2.383213 | -3.570712 | 2.059588  |
| H | -1.815913 | -2.932323 | 2.751524  |
| H | -3.458622 | -3.443100 | 2.226603  |
| H | -2.101289 | -4.619173 | 2.233415  |
| H | 1.437917  | -2.904398 | -1.069716 |
| H | -1.476817 | -1.944333 | -1.285252 |

Ph<sub>2</sub>BOH

|                                               |                    |         |         |
|-----------------------------------------------|--------------------|---------|---------|
| M06-2X SCF energy:                            | -563.41414210 a.u. |         |         |
| M06-2X enthalpy:                              | -563.198860 a.u.   |         |         |
| M06-2X free energy:                           | -563.249635 a.u.   |         |         |
| M06-2X SCF energy in solution:                | -564.03553568 a.u. |         |         |
| M06-2X enthalpy in solution:                  | -563.820254 a.u.   |         |         |
| M06-2X free energy in solution:               | -563.871029 a.u.   |         |         |
| Three lowest frequencies (cm <sup>-1</sup> ): | 39.8980            | 56.2649 | 79.8223 |

Cartesian coordinates

| ATOM | X         | Y         | Z         |
|------|-----------|-----------|-----------|
| B    | -2.728184 | -0.366802 | 0.861803  |
| C    | -3.666092 | -1.518403 | 0.337934  |
| C    | -3.169563 | -2.633254 | -0.357929 |
| C    | -5.048428 | -1.462568 | 0.589686  |
| C    | -4.018180 | -3.654581 | -0.787684 |
| H    | -2.098110 | -2.712700 | -0.558285 |
| C    | -5.904732 | -2.472086 | 0.152704  |
| H    | -5.455399 | -0.608590 | 1.136820  |
| C    | -5.388515 | -3.571561 | -0.537120 |
| H    | -3.610250 | -4.516839 | -1.318720 |
| H    | -6.976301 | -2.406513 | 0.351499  |
| H    | -6.055975 | -4.365916 | -0.877464 |
| C    | -1.301362 | -0.061083 | 0.261313  |
| C    | -1.029631 | -0.199576 | -1.110648 |
| C    | -0.264605 | 0.399135  | 1.092217  |
| C    | 0.224301  | 0.115785  | -1.634608 |
| H    | -1.816741 | -0.548877 | -1.783771 |
| C    | 0.996658  | 0.700158  | 0.578910  |
| H    | -0.437882 | 0.515383  | 2.166528  |
| C    | 1.241278  | 0.561384  | -0.788452 |
| H    | 0.410751  | 0.011913  | -2.705276 |
| H    | 1.789977  | 1.045500  | 1.244642  |
| H    | 2.225877  | 0.800977  | -1.195232 |
| O    | -3.212762 | 0.379171  | 1.889433  |
| H    | -2.626938 | 1.104563  | 2.148030  |

TS7a

|                    |                     |  |  |
|--------------------|---------------------|--|--|
| M06-2X SCF energy: | -1443.25001768 a.u. |  |  |
|--------------------|---------------------|--|--|

M06-2X enthalpy: -1442.733903 a.u.  
M06-2X free energy: -1442.820436 a.u.  
M06-2X SCF energy in solution: -1444.88535043 a.u.  
M06-2X enthalpy in solution: -1444.369236 a.u.  
M06-2X free energy in solution: -1444.455769 a.u.  
Three lowest frequencies (cm-1): -89.6962 32.8300 37.7470  
Imaginary frequency: -89.6962 cm-1

Cartesian coordinates

| ATOM | X         | Y         | Z         |
|------|-----------|-----------|-----------|
| C    | -3.242405 | 1.093907  | -0.685200 |
| C    | -1.140687 | -0.055904 | -1.360485 |
| C    | -1.775049 | 1.290534  | -1.029331 |
| H    | -3.754992 | 0.593409  | -1.527252 |
| H    | -1.601184 | -0.417572 | -2.295332 |
| H    | -1.312480 | 1.694992  | -0.116492 |
| O    | -3.291051 | 0.263470  | 0.466643  |
| C    | -2.819926 | -1.039865 | 0.257498  |
| H    | -2.872654 | -1.517029 | 1.252082  |
| O    | -3.628395 | -1.718798 | -0.657491 |
| C    | -4.966844 | -1.853286 | -0.244697 |
| H    | -5.471787 | -0.876999 | -0.162825 |
| H    | -5.487210 | -2.462550 | -0.994601 |
| H    | -5.030554 | -2.359661 | 0.735126  |
| C    | -3.942309 | 2.393310  | -0.356765 |
| H    | -3.438958 | 2.892624  | 0.485306  |
| H    | -3.919319 | 3.062571  | -1.226510 |
| H    | -4.989227 | 2.204305  | -0.080202 |
| O    | -1.648265 | 2.186386  | -2.106118 |
| H    | -0.703776 | 2.276837  | -2.293589 |
| O    | 0.246516  | 0.044614  | -1.597427 |
| C    | -1.351282 | -1.092642 | -0.239845 |
| O    | -0.482234 | -0.776692 | 0.798733  |
| C    | 2.611002  | -0.133983 | -0.837191 |
| C    | 3.730649  | 0.441290  | -0.217232 |
| C    | 2.826268  | -1.240796 | -1.674471 |
| C    | 5.016217  | -0.068223 | -0.416061 |
| H    | 3.597130  | 1.304583  | 0.440786  |
| C    | 4.102724  | -1.762497 | -1.875916 |
| H    | 1.966918  | -1.697642 | -2.171309 |
| C    | 5.203317  | -1.175024 | -1.244375 |
| H    | 5.872286  | 0.397165  | 0.076979  |
| H    | 4.246596  | -2.626877 | -2.527812 |
| H    | 6.205442  | -1.580557 | -1.400220 |
| C    | 0.993794  | 1.752937  | 0.259616  |
| C    | 0.685223  | 1.799027  | 1.628983  |
| C    | 1.261438  | 2.969134  | -0.392304 |
| C    | 0.635859  | 3.014850  | 2.312669  |
| H    | 0.440184  | 0.866781  | 2.141512  |
| C    | 1.202464  | 4.189970  | 0.284779  |
| H    | 1.524496  | 2.968020  | -1.456227 |

|   |           |           |           |
|---|-----------|-----------|-----------|
| C | 0.889571  | 4.215222  | 1.643565  |
| H | 0.389143  | 3.028557  | 3.376829  |
| H | 1.404775  | 5.121048  | -0.249151 |
| H | 0.843487  | 5.164880  | 2.180570  |
| B | 1.145365  | 0.441635  | -0.634038 |
| C | -0.976433 | -2.522627 | -0.660486 |
| C | -0.728572 | -3.184782 | 0.683854  |
| H | -1.750907 | -2.997686 | -1.274401 |
| H | -0.118850 | -4.096211 | 0.622789  |
| C | 0.012233  | -2.138933 | 1.553830  |
| O | -0.193849 | -2.059285 | 2.783670  |
| O | 1.380439  | -2.215465 | 1.128589  |
| C | 2.301333  | -1.650379 | 2.010352  |
| H | 2.219133  | -2.085640 | 3.019977  |
| H | 3.307341  | -1.846015 | 1.608591  |
| H | 2.181258  | -0.555140 | 2.107177  |
| H | -0.036299 | -2.474826 | -1.229858 |
| H | -1.673599 | -3.430805 | 1.190735  |

TS7b

|                                  |                     |         |         |
|----------------------------------|---------------------|---------|---------|
| M06-2X SCF energy:               | -2006.72480389 a.u. |         |         |
| M06-2X enthalpy:                 | -2005.991838 a.u.   |         |         |
| M06-2X free energy:              | -2006.107204 a.u.   |         |         |
| M06-2X SCF energy in solution:   | -2008.96746012 a.u. |         |         |
| M06-2X enthalpy in solution:     | -2008.234494 a.u.   |         |         |
| M06-2X free energy in solution:  | -2008.349860 a.u.   |         |         |
| Three lowest frequencies (cm-1): | -136.6936           | 16.0259 | 26.4119 |
| Imaginary frequency:             | -136.6936 cm-1      |         |         |

Cartesian coordinates

| ATOM | X         | Y        | Z         |
|------|-----------|----------|-----------|
| C    | 1.427655  | 3.743129 | 0.618592  |
| C    | 2.442863  | 1.964000 | -0.834730 |
| C    | 2.582406  | 2.773108 | 0.456523  |
| H    | 1.374819  | 4.407455 | -0.262547 |
| H    | 2.770720  | 2.620489 | -1.661098 |
| H    | 2.526047  | 2.079433 | 1.313116  |
| O    | 0.248201  | 2.947289 | 0.686817  |
| C    | -0.098691 | 2.338729 | -0.522220 |
| H    | -0.966940 | 1.706421 | -0.278296 |
| O    | -0.440103 | 3.289140 | -1.485127 |
| C    | -1.649518 | 3.956302 | -1.201646 |
| H    | -1.799071 | 4.718834 | -1.976619 |
| H    | -2.498394 | 3.250579 | -1.221947 |
| H    | -1.616242 | 4.448462 | -0.216096 |
| C    | 1.517111  | 4.567779 | 1.882147  |
| H    | 1.536311  | 3.908484 | 2.763207  |
| H    | 2.436947  | 5.166887 | 1.871749  |
| H    | 0.653013  | 5.242042 | 1.964883  |

|   |           |           |           |
|---|-----------|-----------|-----------|
| O | 3.807719  | 3.466496  | 0.458173  |
| H | 4.499021  | 2.808093  | 0.301498  |
| O | 3.239201  | 0.817883  | -0.786308 |
| C | 1.020475  | 1.450217  | -1.113724 |
| O | 0.993972  | 0.163125  | -0.494829 |
| C | 2.986446  | -1.672293 | -0.894851 |
| C | 3.154295  | -2.880760 | -0.202258 |
| C | 3.371389  | -1.664648 | -2.247113 |
| C | 3.649952  | -4.031625 | -0.824267 |
| H | 2.890708  | -2.931725 | 0.858601  |
| C | 3.858984  | -2.804449 | -2.886120 |
| H | 3.299977  | -0.729130 | -2.808163 |
| C | 3.997623  | -3.999372 | -2.174270 |
| H | 3.766649  | -4.955370 | -0.252549 |
| H | 4.142709  | -2.762912 | -3.940627 |
| H | 4.385823  | -4.893781 | -2.666532 |
| C | 2.555128  | -0.396545 | 1.440216  |
| C | 1.406125  | -0.540808 | 2.233013  |
| C | 3.793715  | -0.386073 | 2.103764  |
| C | 1.483674  | -0.669926 | 3.623619  |
| H | 0.428005  | -0.536644 | 1.739960  |
| C | 3.885360  | -0.505207 | 3.491527  |
| H | 4.713427  | -0.276330 | 1.518801  |
| C | 2.726017  | -0.650235 | 4.258963  |
| H | 0.570447  | -0.780508 | 4.213934  |
| H | 4.862376  | -0.485625 | 3.980557  |
| H | 2.792380  | -0.745068 | 5.344956  |
| B | 2.480411  | -0.290999 | -0.183370 |
| C | 0.739368  | 1.125817  | -2.577974 |
| C | -0.495930 | 0.233933  | -2.512309 |
| H | 0.573979  | 2.021687  | -3.185357 |
| H | -0.634897 | -0.376240 | -3.412230 |
| C | -0.377235 | -0.718941 | -1.324201 |
| O | -1.250009 | -0.727391 | -0.373441 |
| O | 0.157764  | -1.885454 | -1.670089 |
| C | 0.018042  | -2.964151 | -0.752592 |
| H | 0.627369  | -3.782320 | -1.150709 |
| H | 0.377484  | -2.685445 | 0.247905  |
| H | -1.033974 | -3.277328 | -0.687792 |
| H | 1.599291  | 0.567475  | -2.975187 |
| H | -1.402904 | 0.835969  | -2.367154 |
| B | -2.797638 | -0.900480 | -0.656560 |
| C | -3.517486 | 0.531851  | -0.365642 |
| C | -4.449967 | 1.078498  | -1.259740 |
| C | -3.291187 | 1.236846  | 0.830593  |
| C | -5.131702 | 2.267892  | -0.977527 |
| H | -4.643676 | 0.552426  | -2.198628 |
| C | -3.964126 | 2.422433  | 1.126658  |
| H | -2.564178 | 0.844690  | 1.550459  |
| C | -4.893323 | 2.942650  | 0.220010  |
| H | -5.853447 | 2.668753  | -1.693707 |

|   |           |           |           |
|---|-----------|-----------|-----------|
| H | -3.765966 | 2.946549  | 2.064802  |
| H | -5.426096 | 3.868673  | 0.446906  |
| C | -3.300901 | -2.017130 | 0.420484  |
| C | -4.479246 | -2.740037 | 0.169446  |
| C | -2.633899 | -2.285567 | 1.627702  |
| C | -4.973627 | -3.684259 | 1.073041  |
| H | -5.022237 | -2.561758 | -0.764582 |
| C | -3.117226 | -3.226114 | 2.540871  |
| H | -1.704142 | -1.752109 | 1.847315  |
| C | -4.292166 | -3.930061 | 2.266338  |
| H | -5.891217 | -4.232460 | 0.846102  |
| H | -2.574209 | -3.416025 | 3.469932  |
| H | -4.672642 | -4.667146 | 2.976794  |
| O | -3.006575 | -1.296378 | -2.028348 |
| H | -2.874890 | -2.245639 | -2.130725 |

10

|                                  |                     |         |         |
|----------------------------------|---------------------|---------|---------|
| M06-2X SCF energy:               | -2006.72825251 a.u. |         |         |
| M06-2X enthalpy:                 | -2005.992916 a.u.   |         |         |
| M06-2X free energy:              | -2006.114919 a.u.   |         |         |
| M06-2X SCF energy in solution:   | -2008.97450414 a.u. |         |         |
| M06-2X enthalpy in solution:     | -2008.239168 a.u.   |         |         |
| M06-2X free energy in solution:  | -2008.361171 a.u.   |         |         |
| Three lowest frequencies (cm-1): | 5.7352              | 16.0008 | 19.5410 |

Cartesian coordinates

| ATOM | X         | Y         | Z         |
|------|-----------|-----------|-----------|
| C    | 1.492867  | 2.913662  | 0.901026  |
| C    | 1.891035  | 0.569303  | 0.162546  |
| C    | 2.053090  | 1.553858  | 1.314251  |
| H    | 2.100975  | 3.280933  | 0.053345  |
| H    | 2.466034  | 0.952085  | -0.694311 |
| H    | 1.470214  | 1.180662  | 2.175041  |
| O    | 0.140246  | 2.767877  | 0.489977  |
| C    | -0.065866 | 1.891341  | -0.581754 |
| H    | -1.161072 | 1.873273  | -0.727978 |
| O    | 0.582129  | 2.319725  | -1.737826 |
| C    | 0.094841  | 3.547779  | -2.229840 |
| H    | 0.629136  | 3.770029  | -3.161726 |
| H    | -0.987502 | 3.485557  | -2.439692 |
| H    | 0.264563  | 4.366826  | -1.512611 |
| C    | 1.525601  | 3.920295  | 2.028927  |
| H    | 0.897269  | 3.572295  | 2.862238  |
| H    | 2.555122  | 4.044684  | 2.388241  |
| H    | 1.147481  | 4.893038  | 1.684785  |
| O    | 3.412851  | 1.715740  | 1.639974  |
| H    | 3.706714  | 0.927387  | 2.114886  |
| O    | 2.384101  | -0.686438 | 0.577258  |
| C    | 0.426919  | 0.468851  | -0.249667 |



|   |           |           |           |
|---|-----------|-----------|-----------|
| O | -0.323373 | -0.011787 | 0.847538  |
| C | 4.397882  | -0.760705 | -1.047149 |
| C | 5.784201  | -0.578667 | -0.909499 |
| C | 3.823768  | -0.500092 | -2.303507 |
| C | 6.565900  | -0.136035 | -1.977691 |
| H | 6.262570  | -0.783220 | 0.052474  |
| C | 4.601959  | -0.076720 | -3.380958 |
| H | 2.748580  | -0.636679 | -2.447563 |
| C | 5.975353  | 0.111841  | -3.217732 |
| H | 7.639708  | 0.009606  | -1.844393 |
| H | 4.134492  | 0.108369  | -4.350074 |
| H | 6.586050  | 0.448195  | -4.057954 |
| C | 3.938507  | -2.567800 | 0.986357  |
| C | 3.319199  | -2.836878 | 2.220476  |
| C | 4.890684  | -3.487022 | 0.514629  |
| C | 3.639193  | -3.975761 | 2.957690  |
| H | 2.575990  | -2.134024 | 2.605265  |
| C | 5.212061  | -4.633347 | 1.243447  |
| H | 5.384292  | -3.310221 | -0.444618 |
| C | 4.587318  | -4.877410 | 2.467295  |
| H | 3.149878  | -4.163912 | 3.915495  |
| H | 5.949751  | -5.338833 | 0.856003  |
| H | 4.838439  | -5.772177 | 3.040745  |
| B | 3.533848  | -1.282408 | 0.166608  |
| C | 0.144956  | -0.521576 | -1.379734 |
| C | -1.307371 | -0.900618 | -1.110838 |
| H | 0.314775  | -0.071161 | -2.365723 |
| H | -1.574111 | -1.922197 | -1.404950 |
| C | -1.494481 | -0.694149 | 0.417749  |
| O | -2.574014 | 0.031012  | 0.771575  |
| O | -1.547355 | -1.909287 | 1.141330  |
| C | -0.458520 | -2.783062 | 0.967926  |
| H | -0.555042 | -3.580443 | 1.717438  |
| H | -0.455980 | -3.253962 | -0.031736 |
| H | 0.501345  | -2.264713 | 1.119543  |
| H | 0.810334  | -1.390463 | -1.264822 |
| H | -1.996359 | -0.218628 | -1.625099 |
| B | -3.959196 | -0.316508 | 0.281194  |
| C | -4.356786 | 0.653371  | -0.984512 |
| C | -4.962133 | 0.151556  | -2.147587 |
| C | -4.110505 | 2.037574  | -0.948308 |
| C | -5.307894 | 0.980402  | -3.220572 |
| H | -5.153214 | -0.923708 | -2.210560 |
| C | -4.444928 | 2.878842  | -2.012359 |
| H | -3.637224 | 2.467447  | -0.058483 |
| C | -5.049001 | 2.350462  | -3.157249 |
| H | -5.776834 | 0.556290  | -4.112279 |
| H | -4.235676 | 3.950126  | -1.952697 |
| H | -5.314772 | 3.002225  | -3.992448 |
| C | -4.976213 | 0.008079  | 1.539658  |
| C | -6.364552 | -0.168211 | 1.393102  |

|   |           |           |           |
|---|-----------|-----------|-----------|
| C | -4.529501 | 0.439843  | 2.798326  |
| C | -7.259391 | 0.065400  | 2.438357  |
| H | -6.757148 | -0.501320 | 0.425568  |
| C | -5.412587 | 0.683981  | 3.856402  |
| H | -3.455338 | 0.582602  | 2.943923  |
| C | -6.784012 | 0.496553  | 3.680944  |
| H | -8.331587 | -0.085343 | 2.288448  |
| H | -5.030082 | 1.021525  | 4.823381  |
| H | -7.478751 | 0.684444  | 4.502578  |
| O | -4.052965 | -1.706407 | -0.159226 |
| H | -3.551490 | -2.243555 | 0.465965  |

TS8

|                                  |                     |         |         |
|----------------------------------|---------------------|---------|---------|
| M06-2X SCF energy:               | -2006.73935640 a.u. |         |         |
| M06-2X enthalpy:                 | -2006.005572 a.u.   |         |         |
| M06-2X free energy:              | -2006.119735 a.u.   |         |         |
| M06-2X SCF energy in solution:   | -2008.97942363 a.u. |         |         |
| M06-2X enthalpy in solution:     | -2008.245639 a.u.   |         |         |
| M06-2X free energy in solution:  | -2008.359802 a.u.   |         |         |
| Three lowest frequencies (cm-1): | -175.0699           | 14.0346 | 26.3619 |
| Imaginary frequency:             | -175.0699 cm-1      |         |         |

Cartesian coordinates

| ATOM | X         | Y         | Z         |
|------|-----------|-----------|-----------|
| C    | 0.516276  | 3.580176  | 1.067877  |
| C    | 1.542409  | 1.924378  | -0.500265 |
| C    | 1.343154  | 2.294266  | 0.971970  |
| H    | 1.103987  | 4.385967  | 0.590487  |
| H    | 2.041812  | 2.791434  | -0.969531 |
| H    | 0.781023  | 1.487201  | 1.478035  |
| O    | -0.721606 | 3.431476  | 0.380494  |
| C    | -0.609556 | 3.118572  | -0.974918 |
| H    | -1.648139 | 2.979982  | -1.329427 |
| O    | 0.038828  | 4.106070  | -1.705742 |
| C    | -0.647855 | 5.337997  | -1.729804 |
| H    | -1.655561 | 5.219227  | -2.164481 |
| H    | -0.748875 | 5.764123  | -0.719151 |
| H    | -0.065967 | 6.026607  | -2.354320 |
| C    | 0.198624  | 3.955818  | 2.497732  |
| H    | -0.368993 | 4.896424  | 2.530224  |
| H    | -0.403636 | 3.165153  | 2.970452  |
| H    | 1.129518  | 4.079245  | 3.065332  |
| O    | 2.566709  | 2.543461  | 1.611832  |
| H    | 3.056511  | 1.709468  | 1.629990  |
| O    | 2.337557  | 0.813420  | -0.758628 |
| C    | 0.174506  | 1.822965  | -1.180407 |
| O    | -0.613723 | 0.811687  | -0.527162 |
| C    | 3.354160  | -1.423229 | -1.092097 |
| C    | 3.956707  | -2.609519 | -0.638313 |

|   |           |           |           |
|---|-----------|-----------|-----------|
| C | 3.641098  | -1.043537 | -2.414518 |
| C | 4.780864  | -3.386315 | -1.456792 |
| H | 3.785155  | -2.938396 | 0.391833  |
| C | 4.464142  | -1.807703 | -3.246908 |
| H | 3.210354  | -0.112168 | -2.792600 |
| C | 5.036092  | -2.988298 | -2.770288 |
| H | 5.228463  | -4.303807 | -1.067227 |
| H | 4.664005  | -1.480006 | -4.270117 |
| H | 5.680255  | -3.590795 | -3.414527 |
| C | 2.777792  | -0.539500 | 1.417407  |
| C | 4.114879  | -0.300568 | 1.783603  |
| C | 1.854891  | -0.710111 | 2.463696  |
| C | 4.511962  | -0.205812 | 3.120899  |
| H | 4.867581  | -0.171914 | 0.998277  |
| C | 2.239006  | -0.625091 | 3.804219  |
| H | 0.804928  | -0.901781 | 2.215123  |
| C | 3.570403  | -0.368391 | 4.138786  |
| H | 5.557471  | -0.008495 | 3.369273  |
| H | 1.495897  | -0.757530 | 4.594323  |
| H | 3.872542  | -0.297747 | 5.185836  |
| B | 2.334135  | -0.524286 | -0.164338 |
| C | 0.252038  | 1.359988  | -2.640603 |
| C | 0.034690  | -0.156963 | -2.562884 |
| H | -0.551278 | 1.839335  | -3.217514 |
| H | 0.962775  | -0.728754 | -2.665256 |
| C | -0.554575 | -0.349273 | -1.177931 |
| O | -1.465010 | -1.200821 | -0.958677 |
| O | 0.914541  | -1.110026 | -0.242418 |
| C | 0.766508  | -2.488623 | -0.023088 |
| H | 0.942307  | -3.071134 | -0.946016 |
| H | 1.483009  | -2.830246 | 0.739946  |
| H | -0.246907 | -2.692287 | 0.348150  |
| H | 1.214322  | 1.632797  | -3.088349 |
| H | -0.693705 | -0.526235 | -3.295529 |
| B | -2.392652 | -1.099138 | 0.327418  |
| C | -3.130579 | -2.541462 | 0.424250  |
| C | -3.800276 | -2.895988 | 1.608362  |
| C | -3.175583 | -3.463233 | -0.633474 |
| C | -4.481029 | -4.107956 | 1.735532  |
| H | -3.781453 | -2.203738 | 2.455754  |
| C | -3.852886 | -4.681426 | -0.519151 |
| H | -2.656077 | -3.227476 | -1.566136 |
| C | -4.510942 | -5.007907 | 0.667102  |
| H | -4.990850 | -4.354791 | 2.669943  |
| H | -3.865041 | -5.380238 | -1.359086 |
| H | -5.040823 | -5.958261 | 0.761255  |
| C | -3.453569 | 0.103642  | 0.008960  |
| C | -3.829700 | 1.006317  | 1.015213  |
| C | -4.041831 | 0.279174  | -1.255651 |
| C | -4.740301 | 2.040438  | 0.778545  |
| H | -3.387057 | 0.902816  | 2.010806  |

|   |           |           |           |
|---|-----------|-----------|-----------|
| C | -4.951349 | 1.308438  | -1.507818 |
| H | -3.776004 | -0.403780 | -2.069293 |
| C | -5.305271 | 2.196124  | -0.487878 |
| H | -5.007925 | 2.728776  | 1.583928  |
| H | -5.388756 | 1.421514  | -2.502897 |
| H | -6.016716 | 3.002139  | -0.679690 |
| O | -1.599032 | -0.866001 | 1.505846  |
| H | -1.231078 | 0.026018  | 1.474232  |

11

|                                  |                     |         |         |
|----------------------------------|---------------------|---------|---------|
| M06-2X SCF energy:               | -1443.31167023 a.u. |         |         |
| M06-2X enthalpy:                 | -1442.794414 a.u.   |         |         |
| M06-2X free energy:              | -1442.882399 a.u.   |         |         |
| M06-2X SCF energy in solution:   | -1444.94241078 a.u. |         |         |
| M06-2X enthalpy in solution:     | -1444.425155 a.u.   |         |         |
| M06-2X free energy in solution:  | -1444.513140 a.u.   |         |         |
| Three lowest frequencies (cm-1): | 26.3051             | 41.5188 | 45.5629 |

Cartesian coordinates

| ATOM | X         | Y         | Z         |
|------|-----------|-----------|-----------|
| C    | 2.429927  | 3.236452  | 1.267616  |
| C    | 2.071401  | 1.491656  | -0.500558 |
| C    | 2.557141  | 1.746699  | 0.927907  |
| H    | 3.150371  | 3.766492  | 0.617016  |
| H    | 2.686938  | 2.154659  | -1.138486 |
| H    | 1.937071  | 1.155842  | 1.629543  |
| O    | 1.121189  | 3.728093  | 1.014279  |
| C    | 0.664391  | 3.544365  | -0.292742 |
| H    | -0.373272 | 3.926741  | -0.292885 |
| O    | 1.435543  | 4.220344  | -1.231786 |
| C    | 1.389802  | 5.622197  | -1.095379 |
| H    | 2.003903  | 6.054068  | -1.895142 |
| H    | 0.355417  | 5.995995  | -1.193850 |
| H    | 1.787484  | 5.946814  | -0.120494 |
| C    | 2.748571  | 3.523367  | 2.718533  |
| H    | 2.011461  | 3.030401  | 3.369886  |
| H    | 3.747970  | 3.139891  | 2.960175  |
| H    | 2.722667  | 4.604642  | 2.914254  |
| O    | 3.924969  | 1.447673  | 1.063932  |
| H    | 4.037679  | 0.511758  | 0.849830  |
| O    | 2.250838  | 0.205122  | -0.989329 |
| C    | 0.649213  | 2.060436  | -0.668486 |
| O    | -0.291956 | 1.476719  | 0.245909  |
| C    | 2.089013  | -2.214013 | -1.574923 |
| C    | 2.258414  | -3.591135 | -1.341501 |
| C    | 1.949079  | -1.825071 | -2.917729 |
| C    | 2.273766  | -4.528385 | -2.377049 |
| H    | 2.391058  | -3.945576 | -0.313330 |
| C    | 1.966595  | -2.748041 | -3.968601 |

|   |           |           |           |
|---|-----------|-----------|-----------|
| H | 1.834513  | -0.759386 | -3.135042 |
| C | 2.126584  | -4.108415 | -3.701384 |
| H | 2.405984  | -5.590014 | -2.153715 |
| H | 1.859294  | -2.405164 | -5.000920 |
| H | 2.142614  | -4.835123 | -4.516652 |
| C | 3.199958  | -1.470222 | 0.770522  |
| C | 2.943118  | -1.463931 | 2.151687  |
| C | 4.529157  | -1.721726 | 0.381941  |
| C | 3.948664  | -1.683541 | 3.097390  |
| H | 1.921627  | -1.263446 | 2.490275  |
| C | 5.550073  | -1.931665 | 1.313492  |
| H | 4.775444  | -1.740907 | -0.685523 |
| C | 5.260737  | -1.913870 | 2.680110  |
| H | 3.712387  | -1.667747 | 4.164329  |
| H | 6.573690  | -2.111540 | 0.975776  |
| H | 6.052775  | -2.077305 | 3.414103  |
| B | 2.023787  | -1.112078 | -0.343103 |
| C | 0.065280  | 1.786061  | -2.062140 |
| C | -0.775533 | 0.535314  | -1.833523 |
| H | -0.569252 | 2.631168  | -2.368979 |
| H | -0.184493 | -0.383246 | -1.962232 |
| C | -1.122004 | 0.613725  | -0.363316 |
| O | -2.022253 | 0.075109  | 0.219135  |
| O | 0.708328  | -1.093953 | 0.318649  |
| C | 0.082520  | -2.275291 | 0.675784  |
| H | -0.264308 | -2.861666 | -0.199972 |
| H | 0.731212  | -2.950182 | 1.272095  |
| H | -0.806175 | -2.045165 | 1.286932  |
| H | 0.857627  | 1.654972  | -2.808500 |
| H | -1.689273 | 0.470251  | -2.436281 |

MeOH

|                                  |                    |           |           |
|----------------------------------|--------------------|-----------|-----------|
| M06-2X SCF energy:               | -115.57616231 a.u. |           |           |
| M06-2X enthalpy:                 | -115.520287 a.u.   |           |           |
| M06-2X free energy:              | -115.547192 a.u.   |           |           |
| M06-2X SCF energy in solution:   | -115.72041131 a.u. |           |           |
| M06-2X enthalpy in solution:     | -115.664536 a.u.   |           |           |
| M06-2X free energy in solution:  | -115.691441 a.u.   |           |           |
| Three lowest frequencies (cm-1): | 365.2264           | 1077.0690 | 1107.3165 |

Cartesian coordinates

| ATOM | X         | Y         | Z         |
|------|-----------|-----------|-----------|
| C    | -0.957372 | 0.588603  | -0.027019 |
| H    | -0.591762 | 1.105214  | 0.872076  |
| H    | -0.602055 | 1.154750  | -0.906813 |
| H    | -2.061161 | 0.635781  | -0.014580 |
| O    | -0.471483 | -0.729214 | 0.002231  |
| H    | -0.801965 | -1.179429 | -0.784940 |
